# Supplementary material
Source: MDPI journal article supplement (https://www.mdpi.com/2077-0472/11/12/1195)
Supplement: s1 [file s1]

# Supplementary file S9 Primers used for RT-qPCR in this study

| Primer ID                     | Unigene         | Primer sequence(5' to 3') |
|-------------------------------|-----------------|---------------------------|
| <b><i>Outer epidermis</i></b> |                 |                           |
| <i>Solyc03g098700-F</i>       | <i>TU040341</i> | gcagcacataccagttcc        |
| <i>Solyc03g098700-R</i>       |                 | tacctcaccaccagttacc       |
| <i>Solyc06g024380-F</i>       | <i>TU039803</i> | gacgaatcggagcgacaaagg     |
| <i>Solyc06g024380-R</i>       |                 | cgagcggcaggtagaatccattg   |
| <i>Solyc10g075090-F</i>       | <i>TU049272</i> | cggcagctaattctattaag      |
| <i>Solyc10g075090-R</i>       |                 | ttcatcaaccttactggac       |
| <i>Solyc10g075100-F</i>       | <i>TU023219</i> | catctaccttggtcctt         |
| <i>Solyc10g075100-R</i>       |                 | ccttaacaccatcacaca        |
| <i>Solyc10g076200-F</i>       | <i>TU141638</i> | cgggtgtggttaagtgtctcc     |
| <i>Solyc10g076200-R</i>       |                 | gtcctacgatcctgtgttgc      |
| <b><i>Collenchyma</i></b>     |                 |                           |
| <i>Solyc01g105040-F</i>       | <i>TU088476</i> | gactgatgaatcgatggaacttc   |
| <i>Solyc01g105040-R</i>       |                 | tcaacaccaacacaacaactcaag  |
| <i>Solyc03g005000-F</i>       | <i>TU030615</i> | tctatcggaccaactgaatgtg    |
| <i>Solyc03g005000-R</i>       |                 | acgctgaagaagtgacctatac    |
| <i>Solyc07g020860-F</i>       | <i>TU105500</i> | aatctcgtgtcaacctaagtag    |
| <i>Solyc07g020860-R</i>       |                 | ggaacggcgaagatgatg        |
| <i>Solyc09g013150-F</i>       | <i>TU020758</i> | acttcaccactgcgactg        |
| <i>Solyc09g013150-R</i>       |                 | aacatagcctgagattgccattg   |
| <i>Solyc10g006790-F</i>       | <i>TU122977</i> | aaggcaccagcacatagc        |
| <i>Solyc10g006790-R</i>       |                 | tgacagcgacacgaatgg        |
| <b><i>Parenchyma</i></b>      |                 |                           |
| <i>Solyc01g067730-F</i>       | <i>TU044280</i> | atcttccttcgccatctcttc     |
| <i>Solyc01g067730-R</i>       |                 | cacactttgtcaactgtctctg    |
| <i>Solyc01g096270-F</i>       | <i>TU051343</i> | cttgccttcggtcctttaccag    |
| <i>Solyc01g096270-R</i>       |                 | gtaaaggacatccaacaaggtagc  |

---

|                                    |                 |                               |
|------------------------------------|-----------------|-------------------------------|
| <i>Solyc04g007770-F</i>            | <i>TU043115</i> | tgggtcttctccttgacttaacc       |
| <i>Solyc04g007770-R</i>            |                 | gccaacatcgcaaattatcatcac      |
| <i>Solyc07g049140-F</i>            | <i>TU048816</i> | gtaaggagaagacggaccagtatg      |
| <i>Solyc07g049140-R</i>            |                 | cacaccaaaggtagacagaacac       |
| <i>Solyc09g007940-F</i>            | <i>TU028407</i> | catccagaggtcgggtgtac          |
| <i>Solyc09g007940-R</i>            |                 | ctctcaatgaaggcataacacagg      |
| <b><i>Vascular</i></b>             |                 |                               |
| <i>Solyc01g111310-F</i>            | <i>TU018287</i> | tgttaccaatgcccacctc           |
| <i>Solyc01g111310-R</i>            |                 | ttcgtcttcattctcatctatcg       |
| <i>Solyc04g026020-F</i>            | <i>TU059280</i> | tgtgctgaatgtagccgtccaatg      |
| <i>Solyc04g026020-R</i>            |                 | acacaacttcattgccagacgtacc     |
| <i>Solyc05g006830-F</i>            | <i>TU045808</i> | ctcactaaaggcgtatcttagc        |
| <i>Solyc05g006830-R</i>            |                 | atagtaatcaactcccattgtagc      |
| <i>Solyc06g075220-F</i>            | <i>TU143495</i> | caccctcggtcagaatcc            |
| <i>Solyc06g075220-R</i>            |                 | gcttgagtagttcctaagagtc        |
| <i>Solyc09g010080-F</i>            | <i>TU144625</i> | acaacccgttgatcgccct           |
| <i>Solyc09g010080-R</i>            |                 | gtattagtagatgaatgaagtggatgttg |
| <b><i>Inner epidermis</i></b>      |                 |                               |
| <i>Solyc04g072310-F</i>            | <i>TU085915</i> | tgaagatggaagaagcaagggtc       |
| <i>Solyc04g072310-R</i>            |                 | tctgaggaggaggtccactac         |
| <i>Solyc04g082170-F</i>            | <i>TU088578</i> | ggcggtcgatttactcattcaag       |
| <i>Solyc04g082170-R</i>            |                 | cgagacgaaatgaaagtaacatgg      |
| <i>Solyc06g065530-F</i>            | <i>TU143409</i> | gcttctggtggttctggtattc        |
| <i>Solyc06g065530-R</i>            |                 | tgtctgctcctccaactctg          |
| <i>Solyc09g062960-F</i>            | <i>TU026456</i> | gctttatggaagtgaagac           |
| <i>Solyc09g062960-R</i>            |                 | gaggtatcggtggcattg            |
| <i>Solyc09g062970-F</i>            | <i>TU000054</i> | gtggagttgttagtgagtag          |
| <i>Solyc09g062970-R</i>            |                 | ccaccaatgccacctaac            |
| <b><i>Fruit-specific genes</i></b> |                 |                               |

---

|                              |              |                       |
|------------------------------|--------------|-----------------------|
| <i>Solyc09g089580-F</i>      | <i>E8</i>    | ggctccgaatcctcctagtc  |
| <i>Solyc09g089580-R</i>      |              | cgagaccgagaccttcagac  |
| <i>Solyc10g080210-F</i>      | <i>PG</i>    | ctattattggaacaggtgatg |
| <i>Solyc10g080210-R</i>      |              | agtaacattagacacataagc |
| <b><i>Reference gene</i></b> |              |                       |
| <i>ACTIN-F</i>               | <i>ACTIN</i> | ttgctgaccgtatgagcaag  |
| <i>ACTIN-R</i>               |              | ggacaatggatggaccagac  |
