# Supplementary material
Source: MDPI journal article supplement (https://www.mdpi.com/2077-0472/11/12/1195)
Supplement: s1 [file s1]

Archive with 7 entries (7 files):
- Supplementary file 1 Number of the tissue-specific genes.xlsx
- Supplementary file 2 promoter -3000 bp to -1 DNA sequences.pdf
- Supplementary file 3-4 Count of base in different  regions.xlsx
- Supplementary file 5 Average genetic distance.pdf
- Supplementary file 6 Genetic distances.xlsx
- Supplementary file 7-8 Distribution of cis elements.xlsx
- Supplementary file 9 Primers used for RT-qPCR in this study.pdf
