# Supplementary material
Source: MDPI journal article supplement (https://www.mdpi.com/2077-0472/11/12/1195)
Supplement: s1 [file s1 › Supplementary file 1 Number of the tissue-specific genes.xlsx]

## Sheet: Sheet1
Supplementary file 1 Number of the tissue-specific genes
	Outer epidermis	Collenchyma	Parenchyma	Vascular	Inner epidermis	Total
Tissue-specific expression gene	217	39	24	284	60	624

## Sheet: Outer epidermis
	Outer epidermis-specific genes[Normalized number of reads (reads per 100,000)]
	Outer epidermis	Collenchyma	Vascular	Parenchyma	Inner epidermis
TU141638	21.8	0	0	0	0
TU040341	21.8	0	0	0	0
TU023219	13.2	0	0	0	0
TU049272	11.1	0	0	0	0
TU137683	10.6	0	0	0	0
TU049706	10.6	0	0	0	0
TU039803	10.6	0	0	0	0
TU042482	9.6	0	0	0	0
TU041258	9.1	0	0	0	0
TU121891	8.6	0	0	0	0
TU039605	8.6	0	0	0	0
TU036802	8.1	0	0	0	0
TU040127	8.1	0	0	0	0
TU141928	7.6	0	0	0	0
TU029594	7.6	0	0	0	0
TU021383	7.6	0	0	0	0
TU027785	7.6	0	0	0	0
TU026742	7.1	0	0	0	0
TU014628	7.1	0	0	0	0
TU047026	7.1	0	0	0	0
TU139462	6.6	0	0	0	0
TU027641	6.6	0	0	0	0
TU028582	6.6	0	0	0	0
TU121757	6.1	0	0	0	0
TU027168	6.1	0	0	0	0
TU039910	6.1	0	0	0	0
TU028690	6.1	0	0	0	0
TU025385	6.1	0	0	0	0
TU042151	6.1	0	0	0	0
TU053809	5.6	0	0	0	0
TU051148	5.6	0	0	0	0
TU145210	5.6	0	0	0	0
TU075973	5.6	0	0	0	0
TU148440	5.6	0	0	0	0
TU037427	5.6	0	0	0	0
TU086067	5.1	0	0	0	0
TU144343	5.1	0	0	0	0
TU112335	5.1	0	0	0	0
TU112854	5.1	0	0	0	0
TU110748	5.1	0	0	0	0
TU059544	5.1	0	0	0	0
TU026138	5.1	0	0	0	0
TU038784	5.1	0	0	0	0
TU031091	5.1	0	0	0	0
TU052146	5.1	0	0	0	0
TU000166	5.1	0	0	0	0
TU124055	5.1	0	0	0	0
TU036032	4.6	0	0	0	0
TU044538	4.6	0	0	0	0
TU044504	4.6	0	0	0	0
TU053112	4.6	0	0	0	0
TU109474	4.6	0	0	0	0
TU109059	4.6	0	0	0	0
TU144215	4.6	0	0	0	0
TU101758	4	0	0	0	0
TU051564	4	0	0	0	0
TU026378	4	0	0	0	0
TU112198	4	0	0	0	0
TU027140	4	0	0	0	0
TU087118	4	0	0	0	0
TU041013	4	0	0	0	0
TU051008	4	0	0	0	0
TU021459	4	0	0	0	0
TU125337	4	0	0	0	0
TU027659	4	0	0	0	0
TU040130	4	0	0	0	0
TU039968	4	0	0	0	0
TU091917	4	0	0	0	0
TU008092	4	0	0	0	0
TU144762	3.5	0	0	0	0
TU039779	3.5	0	0	0	0
TU028553	3.5	0	0	0	0
TU044732	3.5	0	0	0	0
TU052267	3.5	0	0	0	0
TU042423	3.5	0	0	0	0
TU139864	3.5	0	0	0	0
TU028117	3.5	0	0	0	0
TU111009	3.5	0	0	0	0
TU113729	3.5	0	0	0	0
TU123021	3.5	0	0	0	0
TU016350	3.5	0	0	0	0
TU121174	3.5	0	0	0	0
TU024401	3.5	0	0	0	0
TU046764	3.5	0	0	0	0
TU039896	3.5	0	0	0	0
TU028096	3.5	0	0	0	0
TU024841	3.5	0	0	0	0
TU061613	3.5	0	0	0	0
TU086228	3.5	0	0	0	0
TU141380	3.5	0	0	0	0
TU027293	3.5	0	0	0	0
TU042297	3.5	0	0	0	0
TU098591	3	0	0	0	0
TU097426	3	0	0	0	0
TU111013	3	0	0	0	0
TU113357	3	0	0	0	0
TU140416	3	0	0	0	0
TU143251	3	0	0	0	0
TU051767	3	0	0	0	0
TU038713	3	0	0	0	0
TU041219	3	0	0	0	0
TU122031	3	0	0	0	0
TU271210	3	0	0	0	0
TU114686	3	0	0	0	0
TU124708	3	0	0	0	0
TU138998	3	0	0	0	0
TU121136	3	0	0	0	0
TU106024	3	0	0	0	0
TU083053	3	0	0	0	0
TU026509	3	0	0	0	0
TU118813	3	0	0	0	0
TU031620	3	0	0	0	0
TU133106	3	0	0	0	0
TU061008	3	0	0	0	0
TU139933	3	0	0	0	0
TU113095	3	0	0	0	0
TU060228	3	0	0	0	0
TU110593	3	0	0	0	0
TU049965	3	0	0	0	0
TU060382	3	0	0	0	0
TU052851	3	0	0	0	0
TU050303	3	0	0	0	0
TU116818	3	0	0	0	0
TU110911	3	0	0	0	0
TU131451	3	0	0	0	0
TU026050	3	0	0	0	0
TU046063	3	0	0	0	0
TU131923	3	0	0	0	0
TU044495	3	0	0	0	0
TU036451	3	0	0	0	0
TU086815	3	0	0	0	0
TU114637	3	0	0	0	0
TU027887	3	0	0	0	0
TU044017	3	0	0	0	0
TU129785	2.5	0	0	0	0
TU143191	2.5	0	0	0	0
TU063004	2.5	0	0	0	0
TU121603	2.5	0	0	0	0
TU020851	2.5	0	0	0	0
TU031737	2.5	0	0	0	0
TU039443	2.5	0	0	0	0
TU042857	2.5	0	0	0	0
TU046891	2.5	0	0	0	0
TU107963	2.5	0	0	0	0
TU141541	2.5	0	0	0	0
TU117438	2.5	0	0	0	0
TU018822	2.5	0	0	0	0
TU116279	2.5	0	0	0	0
TU113064	2.5	0	0	0	0
TU084757	2.5	0	0	0	0
TU060496	2.5	0	0	0	0
TU126432	2.5	0	0	0	0
TU068962	2.5	0	0	0	0
TU126287	2.5	0	0	0	0
TU072776	2.5	0	0	0	0
TU145497	2.5	0	0	0	0
TU087550	2.5	0	0	0	0
TU026864	2.5	0	0	0	0
TU053884	2.5	0	0	0	0
TU348512	2.5	0	0	0	0
TU124615	2.5	0	0	0	0
TU050447	2.5	0	0	0	0
TU064436	2.5	0	0	0	0
TU051250	2.5	0	0	0	0
TU008468	2.5	0	0	0	0
TU024173	2.5	0	0	0	0
TU027023	2.5	0	0	0	0
TU207936	2.5	0	0	0	0
TU040535	2.5	0	0	0	0
TU102423	2.5	0	0	0	0
TU091034	2.5	0	0	0	0
TU059806	2.5	0	0	0	0
TU123313	2.5	0	0	0	0
TU128152	2.5	0	0	0	0
TU055426	2.5	0	0	0	0
TU025623	2.5	0	0	0	0
TU033787	2.5	0	0	0	0
TU095324	2.5	0	0	0	0
TU008180	2.5	0	0	0	0
TU096187	2.5	0	0	0	0
TU009081	2.5	0	0	0	0
TU015230	2.5	0	0	0	0
TU047188	2.5	0	0	0	0
TU098297	2.5	0	0	0	0
TU100341	2.5	0	0	0	0
TU015397	2.5	0	0	0	0
TU028317	2.5	0	0	0	0
TU050960	2.5	0	0	0	0
TU125349	2.5	0	0	0	0
TU119271	2.5	0	0	0	0
TU093496	2.5	0	0	0	0
TU059851	2.5	0	0	0	0
TU101218	2.5	0	0	0	0
TU116425	2.5	0	0	0	0
TU112688	2.5	0	0	0	0
TU043984	2.5	0	0	0	0
TU014961	2.5	0	0	0	0
TU130747	2.5	0	0	0	0
TU015830	2.5	0	0	0	0
TU108731	2.5	0	0	0	0
TU043032	2.5	0	0	0	0
TU051940	2.5	0	0	0	0
TU003678	2.5	0	0	0	0
TU035655	2.5	0	0	0	0
TU109196	2.5	0	0	0	0
TU138488	2.5	0	0	0	0
TU112901	2.5	0	0	0	0
TU119425	2.5	0	0	0	0
TU036373	2.5	0	0	0	0
TU116454	2.5	0	0	0	0
TU144855	2.5	0	0	0	0
TU110680	2.5	0	0	0	0
TU045423	2.5	0	0	0	0
TU123010	2.5	0	0	0	0
TU117838	2.5	0	0	0	0
TU099389	2.5	0	0	0	0
TU051744	2.5	0	0	0	0

## Sheet: Collenchyma
Collenchyma-specific genes[Normalized number of reads (reads per 100,000)]
	Outer epidermis	Collenchyma	Vascular	Parenchyma	Inner epidermis
TU105500	0	10.6	0	0	0
TU030615	0	5.3	0	0	0
TU122977	0	4.8	0	0	0
TU020758	0	3.7	0	0	0
TU088476	0	3.7	0	0	0
TU099185	0	3.2	0	0	0
TU094834	0	3.2	0	0	0
TU054932	0	3.2	0	0	0
TU097316	0	3.2	0	0	0
TU090235	0	3.2	0	0	0
TU145191	0	3.2	0	0	0
TU090753	0	3.2	0	0	0
TU022225	0	3.2	0	0	0
TU088503	0	2.7	0	0	0
TU129350	0	2.7	0	0	0
TU053702	0	2.7	0	0	0
TU016939	0	2.7	0	0	0
TU125483	0	2.7	0	0	0
TU031118	0	2.7	0	0	0
TU189982	0	2.7	0	0	0
TU030573	0	2.7	0	0	0
TU091303	0	2.7	0	0	0
TU007105	0	2.7	0	0	0
TU089061	0	2.7	0	0	0
TU118843	0	2.7	0	0	0
TU105790	0	2.7	0	0	0
TU021759	0	2.7	0	0	0
TU111195	0	2.7	0	0	0
TU054961	0	2.7	0	0	0
TU282613	0	2.7	0	0	0
TU095388	0	2.7	0	0	0
TU050200	0	2.7	0	0	0
TU128749	0	2.7	0	0	0
TU118046	0	2.7	0	0	0
TU116694	0	2.7	0	0	0
TU100225	0	2.7	0	0	0
TU028232	0	2.7	0	0	0
TU020712	0	2.7	0	0	0
TU101097	0	2.7	0	0	0

## Sheet: Parenchyma
Parenchyma-specific genes[Normalized number of reads (reads per 100,000)]
	Outer epidermis	Collenchyma	Vascular	Parenchyma	Inner epidermis
TU048816	0	0	0	7.6	0
TU055988	0	0	0	5.7	0
TU045426	0	0	0	5.2	0
TU043115	0	0	0	5.2	0
TU056174	0	0	0	4.3	0
TU028407	0	0	0	3.8	0
TU051343	0	0	0	3.8	0
TU044280	0	0	0	3.8	0
TU053243	0	0	0	3.3	0
TU142475	0	0	0	2.8	0
TU137635	0	0	0	2.8	0
TU139784	0	0	0	2.8	0
TU111394	0	0	0	2.8	0
TU129470	0	0	0	2.8	0
TU120720	0	0	0	2.8	0
TU038088	0	0	0	2.4	0
TU124081	0	0	0	2.4	0
TU019224	0	0	0	2.4	0
TU050189	0	0	0	2.4	0
TU037053	0	0	0	2.4	0
TU113974	0	0	0	2.4	0
TU007985	0	0	0	2.4	0
TU122053	0	0	0	2.4	0
TU103778	0	0	0	2.4	0

## Sheet: Vascular
Vascular-specific genes [Normalized number of reads (reads per 100,000)]
	Outer epidermis	Collenchyma	Vascular	Parenchyma	Inner epidermis
TU143495	0	0	69.4	0	0
TU059280	0	0	36.6	0	0
TU045808	0	0	30.9	0	0
TU018287	0	0	16.4	0	0
TU061184	0	0	15.9	0	0
TU144625	0	0	14.5	0	0
TU052369	0	0	14.1	0	0
TU061736	0	0	13.6	0	0
TU141792	0	0	13.1	0	0
TU034363	0	0	12.7	0	0
TU121196	0	0	12.7	0	0
TU040824	0	0	11.7	0	0
TU037989	0	0	11.7	0	0
TU115996	0	0	10.8	0	0
TU046206	0	0	10.8	0	0
TU084772	0	0	10.8	0	0
TU124573	0	0	10.8	0	0
TU122732	0	0	9.8	0	0
TU122057	0	0	9.8	0	0
TU122766	0	0	9.4	0	0
TU132003	0	0	8.9	0	0
TU122856	0	0	8.9	0	0
TU114291	0	0	8.4	0	0
TU124142	0	0	8.4	0	0
TU132430	0	0	8.4	0	0
TU000344	0	0	8.4	0	0
TU049945	0	0	8	0	0
TU138397	0	0	8	0	0
TU052847	0	0	7.5	0	0
TU121436	0	0	7.5	0	0
TU124508	0	0	7.5	0	0
TU023087	0	0	7.5	0	0
TU136088	0	0	7.5	0	0
TU047337	0	0	7.5	0	0
TU039707	0	0	7.5	0	0
TU029727	0	0	7	0	0
TU126279	0	0	7	0	0
TU086467	0	0	7	0	0
TU032448	0	0	7	0	0
TU128717	0	0	7	0	0
TU058358	0	0	7	0	0
TU033750	0	0	7	0	0
TU124101	0	0	6.6	0	0
TU119160	0	0	6.6	0	0
TU020365	0	0	6.6	0	0
TU086816	0	0	6.6	0	0
TU129453	0	0	6.6	0	0
TU045345	0	0	6.6	0	0
TU118214	0	0	6.1	0	0
TU050228	0	0	6.1	0	0
TU085798	0	0	6.1	0	0
TU049785	0	0	6.1	0	0
TU123758	0	0	6.1	0	0
TU116847	0	0	6.1	0	0
TU034230	0	0	6.1	0	0
TU125837	0	0	6.1	0	0
TU117491	0	0	5.6	0	0
TU085145	0	0	5.6	0	0
TU059017	0	0	5.6	0	0
TU086154	0	0	5.6	0	0
TU037611	0	0	5.6	0	0
TU117642	0	0	5.6	0	0
TU022143	0	0	5.6	0	0
TU124881	0	0	5.2	0	0
TU084478	0	0	5.2	0	0
TU029698	0	0	5.2	0	0
TU116941	0	0	5.2	0	0
TU020935	0	0	5.2	0	0
TU087520	0	0	5.2	0	0
TU060919	0	0	5.2	0	0
TU058620	0	0	5.2	0	0
TU118778	0	0	5.2	0	0
TU041236	0	0	5.2	0	0
TU030645	0	0	5.2	0	0
TU083355	0	0	5.2	0	0
TU143379	0	0	5.2	0	0
TU034026	0	0	4.7	0	0
TU061226	0	0	4.7	0	0
TU033065	0	0	4.7	0	0
TU087173	0	0	4.7	0	0
TU126977	0	0	4.7	0	0
TU032149	0	0	4.2	0	0
TU055859	0	0	4.2	0	0
TU042476	0	0	4.2	0	0
TU117127	0	0	4.2	0	0
TU091478	0	0	4.2	0	0
TU034143	0	0	4.2	0	0
TU089852	0	0	4.2	0	0
TU040708	0	0	4.2	0	0
TU087911	0	0	4.2	0	0
TU020648	0	0	4.2	0	0
TU127386	0	0	4.2	0	0
TU126783	0	0	4.2	0	0
TU116372	0	0	4.2	0	0
TU046793	0	0	4.2	0	0
TU061535	0	0	4.2	0	0
TU128914	0	0	4.2	0	0
TU092319	0	0	4.2	0	0
TU052550	0	0	4.2	0	0
TU035678	0	0	4.2	0	0
TU038529	0	0	4.2	0	0
TU086990	0	0	4.2	0	0
TU097401	0	0	3.7	0	0
TU061007	0	0	3.7	0	0
TU089537	0	0	3.7	0	0
TU116912	0	0	3.7	0	0
TU045812	0	0	3.7	0	0
TU033774	0	0	3.7	0	0
TU115667	0	0	3.7	0	0
TU020809	0	0	3.7	0	0
TU047112	0	0	3.7	0	0
TU073650	0	0	3.7	0	0
TU030644	0	0	3.7	0	0
TU043657	0	0	3.7	0	0
TU097370	0	0	3.7	0	0
TU029275	0	0	3.7	0	0
TU091549	0	0	3.7	0	0
TU117740	0	0	3.7	0	0
TU125148	0	0	3.7	0	0
TU117940	0	0	3.7	0	0
TU038943	0	0	3.7	0	0
TU033062	0	0	3.7	0	0
TU083236	0	0	3.7	0	0
TU030639	0	0	3.7	0	0
TU124891	0	0	3.7	0	0
TU029626	0	0	3.3	0	0
TU124853	0	0	3.3	0	0
TU124994	0	0	3.3	0	0
TU132712	0	0	3.3	0	0
TU059995	0	0	3.3	0	0
TU103137	0	0	3.3	0	0
TU059329	0	0	3.3	0	0
TU048766	0	0	3.3	0	0
TU093445	0	0	3.3	0	0
TU123161	0	0	3.3	0	0
TU032298	0	0	3.3	0	0
TU086677	0	0	3.3	0	0
TU088176	0	0	3.3	0	0
TU076816	0	0	3.3	0	0
TU083310	0	0	3.3	0	0
TU029803	0	0	3.3	0	0
TU051937	0	0	3.3	0	0
TU127513	0	0	3.3	0	0
TU048906	0	0	3.3	0	0
TU142104	0	0	3.3	0	0
TU022642	0	0	3.3	0	0
TU043067	0	0	3.3	0	0
TU035416	0	0	3.3	0	0
TU056784	0	0	3.3	0	0
TU040838	0	0	3.3	0	0
TU032326	0	0	3.3	0	0
TU033086	0	0	2.8	0	0
TU053038	0	0	2.8	0	0
TU020547	0	0	2.8	0	0
TU087367	0	0	2.8	0	0
TU045905	0	0	2.8	0	0
TU061310	0	0	2.8	0	0
TU115789	0	0	2.8	0	0
TU092534	0	0	2.8	0	0
TU074481	0	0	2.8	0	0
TU087526	0	0	2.8	0	0
TU083537	0	0	2.8	0	0
TU116616	0	0	2.8	0	0
TU005989	0	0	2.8	0	0
TU030002	0	0	2.8	0	0
TU045218	0	0	2.8	0	0
TU037412	0	0	2.8	0	0
TU022228	0	0	2.8	0	0
TU126094	0	0	2.8	0	0
TU129354	0	0	2.8	0	0
TU022173	0	0	2.8	0	0
TU094124	0	0	2.8	0	0
TU000886	0	0	2.8	0	0
TU021059	0	0	2.8	0	0
TU084655	0	0	2.8	0	0
TU124479	0	0	2.8	0	0
TU125150	0	0	2.8	0	0
TU037295	0	0	2.8	0	0
TU094495	0	0	2.8	0	0
TU120122	0	0	2.8	0	0
TU039759	0	0	2.8	0	0
TU053452	0	0	2.8	0	0
TU085990	0	0	2.8	0	0
TU127080	0	0	2.8	0	0
TU126688	0	0	2.8	0	0
TU021011	0	0	2.8	0	0
TU035833	0	0	2.8	0	0
TU055258	0	0	2.8	0	0
TU097052	0	0	2.8	0	0
TU125590	0	0	2.8	0	0
TU094914	0	0	2.8	0	0
TU083098	0	0	2.8	0	0
TU127385	0	0	2.8	0	0
TU000416	0	0	2.8	0	0
TU088185	0	0	2.8	0	0
TU029816	0	0	2.8	0	0
TU139174	0	0	2.8	0	0
TU086479	0	0	2.8	0	0
TU053835	0	0	2.8	0	0
TU020966	0	0	2.8	0	0
TU056928	0	0	2.3	0	0
TU180701	0	0	2.3	0	0
TU049444	0	0	2.3	0	0
TU141493	0	0	2.3	0	0
TU095554	0	0	2.3	0	0
TU057244	0	0	2.3	0	0
TU135897	0	0	2.3	0	0
TU089229	0	0	2.3	0	0
TU000340	0	0	2.3	0	0
TU070347	0	0	2.3	0	0
TU053618	0	0	2.3	0	0
TU020213	0	0	2.3	0	0
TU032482	0	0	2.3	0	0
TU129091	0	0	2.3	0	0
TU054606	0	0	2.3	0	0
TU038878	0	0	2.3	0	0
TU052036	0	0	2.3	0	0
TU142983	0	0	2.3	0	0
TU019893	0	0	2.3	0	0
TU188398	0	0	2.3	0	0
TU068275	0	0	2.3	0	0
TU116633	0	0	2.3	0	0
TU093688	0	0	2.3	0	0
TU116593	0	0	2.3	0	0
TU126448	0	0	2.3	0	0
TU032685	0	0	2.3	0	0
TU067106	0	0	2.3	0	0
TU087422	0	0	2.3	0	0
TU090844	0	0	2.3	0	0
TU022736	0	0	2.3	0	0
TU083701	0	0	2.3	0	0
TU117884	0	0	2.3	0	0
TU092015	0	0	2.3	0	0
TU001776	0	0	2.3	0	0
TU123736	0	0	2.3	0	0
TU060400	0	0	2.3	0	0
TU030386	0	0	2.3	0	0
TU116767	0	0	2.3	0	0
TU089447	0	0	2.3	0	0
TU129268	0	0	2.3	0	0
TU118972	0	0	2.3	0	0
TU125828	0	0	2.3	0	0
TU119047	0	0	2.3	0	0
TU034101	0	0	2.3	0	0
TU015414	0	0	2.3	0	0
TU115564	0	0	2.3	0	0
TU117555	0	0	2.3	0	0
TU085860	0	0	2.3	0	0
TU057430	0	0	2.3	0	0
TU062558	0	0	2.3	0	0
TU051525	0	0	2.3	0	0
TU022518	0	0	2.3	0	0
TU028832	0	0	2.3	0	0
TU046137	0	0	2.3	0	0
TU032773	0	0	2.3	0	0
TU127705	0	0	2.3	0	0
TU069051	0	0	2.3	0	0
TU098222	0	0	2.3	0	0
TU082804	0	0	2.3	0	0
TU045331	0	0	2.3	0	0
TU128647	0	0	2.3	0	0
TU024045	0	0	2.3	0	0
TU062278	0	0	2.3	0	0
TU096245	0	0	2.3	0	0
TU057951	0	0	2.3	0	0
TU020624	0	0	2.3	0	0
TU091449	0	0	2.3	0	0
TU057742	0	0	2.3	0	0
TU057340	0	0	2.3	0	0
TU092554	0	0	2.3	0	0
TU058351	0	0	2.3	0	0
TU022089	0	0	2.3	0	0
TU135913	0	0	2.3	0	0
TU112037	0	0	2.3	0	0
TU128614	0	0	2.3	0	0
TU083335	0	0	2.3	0	0
TU083054	0	0	2.3	0	0
TU017060	0	0	2.3	0	0
TU101992	0	0	2.3	0	0
TU136323	0	0	2.3	0	0
TU129615	0	0	2.3	0	0
TU000358	0	0	2.3	0	0
TU126340	0	0	2.3	0	0
TU033242	0	0	2.3	0	0

## Sheet: Inner epidermis
Inner epidermis-specific genes [Normalized number of reads (reads per 100,000)]
	Outer epidermis	Collenchyma	Vascular	Parenchyma	Inner epidermis
TU000054	0	0	0	0	6.6
TU026456	0	0	0	0	4.9
TU088578	0	0	0	0	4.4
TU085915	0	0	0	0	4
TU143409	0	0	0	0	3.5
TU096756	0	0	0	0	3.5
TU107159	0	0	0	0	3.5
TU125217	0	0	0	0	3.1
TU124984	0	0	0	0	3.1
TU127635	0	0	0	0	3.1
TU023768	0	0	0	0	3.1
TU022051	0	0	0	0	3.1
TU097265	0	0	0	0	3.1
TU026179	0	0	0	0	3.1
TU094047	0	0	0	0	2.7
TU037434	0	0	0	0	2.7
TU090071	0	0	0	0	2.7
TU123365	0	0	0	0	2.7
TU087248	0	0	0	0	2.7
TU120693	0	0	0	0	2.7
TU075641	0	0	0	0	2.7
TU030767	0	0	0	0	2.7
TU113905	0	0	0	0	2.7
TU020226	0	0	0	0	2.7
TU083376	0	0	0	0	2.7
TU083077	0	0	0	0	2.7
TU111177	0	0	0	0	2.7
TU083874	0	0	0	0	2.7
TU117157	0	0	0	0	2.7
TU126703	0	0	0	0	2.2
TU111425	0	0	0	0	2.2
TU040408	0	0	0	0	2.2
TU088986	0	0	0	0	2.2
TU048624	0	0	0	0	2.2
TU124576	0	0	0	0	2.2
TU023186	0	0	0	0	2.2
TU094408	0	0	0	0	2.2
TU091248	0	0	0	0	2.2
TU093191	0	0	0	0	2.2
TU082019	0	0	0	0	2.2
TU025435	0	0	0	0	2.2
TU088534	0	0	0	0	2.2
TU066883	0	0	0	0	2.2
TU024603	0	0	0	0	2.2
TU118832	0	0	0	0	2.2
TU132626	0	0	0	0	2.2
TU019793	0	0	0	0	2.2
TU095151	0	0	0	0	2.2
TU044705	0	0	0	0	2.2
TU038315	0	0	0	0	2.2
TU043288	0	0	0	0	2.2
TU031001	0	0	0	0	2.2
TU037962	0	0	0	0	2.2
TU055291	0	0	0	0	2.2
TU022936	0	0	0	0	2.2
TU050295	0	0	0	0	2.2
TU123474	0	0	0	0	2.2
TU117212	0	0	0	0	2.2
TU137863	0	0	0	0	2.2
TU113657	0	0	0	0	2.2
