# Supplementary material
Source: MDPI journal article supplement (https://www.mdpi.com/2077-0472/11/12/1195)
Supplement: s1 [file s1 › Supplementary file 2 promoter -3000 bp to -1 DNA sequences.pdf]

## Supplementary file S2 Promoters (DNA sequence 3 kb upstream from the ATG initiation codon)

A total of 25 promoters were obtained from five tissues (targeting five per tissue): outer epidermis (**oep**), collenchyma (**col**), parenchyma (**par**), vascular (**vas**), and inner epidermis (**iep**).

### Outer epidermis

#### >Solyc10g076200.1

```
ctatattataatttatggttgagatccatttaaattatatactcatcgttaataataaaaaacaacaaagtatcaactatttttttgtga
gacgaccaaataaattaataatatacccaaaccaatattttcaagaaaaaattaagattaacgaaaatatgtgaactttgttaa
tattttacccgcaaacctcgtagcttttgagaagaccatgccaatcaattgaaaatatgtattcatttgatagtcgaaatgcaaagt
agtcacacaacaaataggagaaagagtagtaaaaaaaaaatgaaataatgcaataatcagagaaaaataatgtgatagtcg
atatcgagagagaaagaaactaaaagaatagtgttaattgtatttttgatagtcacgaaaataaaaatagttgacagtttgtt
gtttttattataagatgagtatataattaaatgaatctgaactataaattataatataatacacatagcatgaatctataaggctatt
gaatattaattgacctaattatacttgaccagattttatcctcatcactacgatgtaaatgtaaaaaaaaacaatttaataagcttaa
caagaaaatcttatatctttcttgatgtcaaaaagtaacgaataaaattatttttaaaaatactaaacaaataaaaagtgaaca
aatagagtaattaataattgggagatgtaattcaataaaccacttttgatgtgtaaacgttttttctgctaaaaatgtgcatcttgg
cctaattcatgtgttttggttggtcaatacttatattaatttctaccgaactaatattaacaaactcaaatttaggccaggggccataa
taagtttgatcattagattaagcatagatcaattaatgttttcgagttttctattttatttagtcaaaagtcttaaaatattttttgaaa
acaagttcagtaaaaaagatgaggacaatgatattcctaataaaagtacgaaaaacaagttcaacattaaattctaacattagtttt
gtcctcccatatcctcaacatatcttcttcacgatacctcttagtccccaggctacacaaacttttatagtatatgcaaagattatat
ataagaaaattttttagaagaataattttcgaataagtgaagaaattcactatttttctaaaaatattttcttcatatggaagacac
catgagaacaactcaatctaaaatagtaaaacaattgctatagaaggggaggtcctaggcagggcgacactagaggttgcc
gaggggaattcacccaacatcctactaaaaattatatggtatattaagaatttttatatttagtaattttaaaactcctaaatgt
aaattaaaggtttgttagtgaataaggaagattcaaaactaatcttgggtccaagatcttatcttaggcactactcttttcttaaac
ccctaataatcttaaaccccttaatagaattctgaattgtccctgattcaaggatataaaagttaagttgctacacaacatatattt
ttattttaattatattatcgatacacttctcatatgagggctgattcttttttatgggtcaaacacttgaatttttttgatatagatg
acgatgagattcaatattagattaccatgttggggtatgatatatgcgcttcactcaacctcaaaagctagctcactaattctgtgaa
actacgtcatcaaaatttctaacattcatgtcttcaacacatctcatcttcaccaatctctgcctaggccctatgcacacatatcaat
aatatttaaatttgactattataactttatggagttatattaatttaaggttagcatttttaaaaaaataataataaaacctgttgat
aaaaataaaatctttattttaacctagggtgtaagtaaaataaaaaggatggagtatattatgtaattatgtacaaaagaaaa
ggattgaatttaataacaaactgccaactaagggcctgtttggatgggcttaataaaagcagtttaaaaaataacttttaaaagt
gctgaaacttttttaaaaataagcagttatgcgtttggataaaagtgtgaagttgtatgtcaaacgtgaaaatggataaatgg
aagaaagaaatgttaggggtatatgaataatttgagattgtataaaaatattaagcacaaaaagataaaaatgtggtcaactta
aaacagcttataagctaaaaataaaaaagcaccctacccagctttaacttttgcttaaaataagttttttaacttaaaataaa
ctgttttgagatttgccaaacagctaaataagtcaaaaaccagttttaagtcagtttgactagctttaagctgagccaaacaggct
ctaattctcacttttataaagcccaaagggtacccaacacatgggcaacataaacttttatcttttgaaaagttaatttgatcaa
cttttaaatcaattcaaaagccttcttacaataaataagaaaaaataaaatattttttaacctagggtgtaagtaaaatgaatc
gaaggggagtatattttaataattatgtaccgcaaaaaaaaacatttcaatcaagtgcttccaattcgagtctcattggatatgg
agttgccttagttaggaagcgcttaccctcaatatgaaacttgcagcgcggaatttgaatttaattgggctccaatatgtgtatcg
tcaccgaaatgaaaaaaaatctaataaccaactgccaactaattctccactctataaaagcccaaaagggtactcaacacttg
gcaacatacattttctttctctaaatatacatctcttttaagatttttttttaaaaaaa
```

---

**>Solyc03g098700.1**

tgtgcttaggaatgccccagtatattaacaacatcacgtaggaagatcctggcagcttcctggctttgcagttagtcgtggtggcg  
gtgaacgtcgcatacttgagaaagcgcgtaccatgaccataattgttccgaagcctccgaatttggaagcatgttatgaaatc  
catggtgacgtgtccaaggcttttcagcaatgggcagcggctccagcaatccgccgagtagctttgtctcaactttgtcctgttg  
gcagacaaggcacgttcgcacgtatgcctcaacgtcatccgcacccgagtagtatgatgcttcagtaatgccaaagtt  
ctcttctgcctgggtgaccagccctggcagaatcgtggccttcctcattaaggtagcgggaaggttagcccacttcgggacgt  
acacacgcctaccgttgatatagcaggtcgtcttctccaaaacttcttggtcttgctgggccaaggcaaagagctgtt  
tggccatgggatcatgttgcaatccctgcttaatgtcatcaacaattgagctgatgcttgagctcacaatagctgccaatgaagcc  
ctgaggtaagggcatcagccaccacgtttgctttcccgcttgactccagagtaaagtcgaactctgtaggtaattcttgcca  
tcgagcttgcttggtggatagcttctttgggttgaaaaataggctcgtcgcgacgttgccgtcttgacgacaaagtgtgccccca  
gcaagtagtggcgccacgtttcaggcagtgaccacgcccgtcatttctctcatgtgctgagtagccgtactccgcttcattca  
gctttcgactctcataggctatcgggtggccctctgcattaggacgccaccgatagcgaagtctgatgcacccgtgtggatttcg  
aatagcttgagaaatctggcaaggccaacacaggctctgcgtcacagccaacttcagcctctcaaaggtagcttggaagct  
gccgaccaattccaggcagatccttttcagcaagtctgtgagaggtgctgcaattgcggaataattgaagataaagcgccgg  
tagtaattagccagaccaaggaatgacctcaattctggtacctcgttggtgcttccagttggtgatagcagctatctgtcgtat  
ccattgaaatctgcatggtgatagtggtgccaagaaaacggacaattggtgtgcaaaactgcacttttcacgcttcacgtac  
agctcgtgtcgcagagaatctgaacacctgcacaagtgtctacgtggcttccatgtgtcgtgtagacaacgatcatcc  
aggtaaacacacaactgatccaagtaggagtggaacagtctgttcacagtgtgcaaaatgttgccggtgcgtttgtcaac  
ccaaatggcattaccagccaatcgaacgcccataacgtgttacacaagcagctctcggtcatcgccatcggcaatccgaactt  
gatgatagtcttctcaaatccattttggtgaacaccttcgctgtcccaaccggctgaacaaatctgcgatcaaaaggcacgggg  
tattgttcttaccgtgactttgttgagagcccgtagtcgatgcacaatcgcagcgtcccgtccttcttctttggaatgacacag  
gtgcaccaaacggtgccttgacggcctgatgtgccagcatccagcagcaccaaacgggtaccattgaattaattcactatgtt  
aacaatggtgaagtgaacgacattaaaaactaagttcacatatattgattatgaactctcaaatgtgaagttgagaataggtaa  
caggcaaacatattaaaaacttttaattttgtatgaattattaatttttttaattattgatagtttttaaacatccctttatttatc  
tactgtaatagaatcactttatcggtcattcatatgttcaaactgttacatgtcctgattttagtagtccaaattaatgtattccaaattg  
aagagatgtcaatgtattaattaggcctactacaactgggaaaaaattaattaaccatcgtagacattacattgatttaattatggt  
ctaataattggtctcatcggcacattagtagtaatatatccattattggcctgctacagtgaactccaagtagagttaatgata  
ataacggaaaaatttgctacttaactattcttaatttcttggtgacgatatatgaaaaacaatgtgtacagccgtatgataagtaa  
aactaattaaaggttacaaacttaattcactccattcattcatttcttatcatattcaaaaaataattttctcaaaaataattttcaattata  
ccatcaaaagagaattaattatcattttcttttaattcttataataaactcttttaaaagttaaataagtttctaaagttttcttaa  
aaaaagtcacagtaaatattttttataaaaaataaactattatggagctcaaattttacaataaattatttttaaaagtttaagt  
taaaattttttttataaaaaaaaagagagtaaatatacgactgtttgacgcaaaacttgacagtgggggatgaagaaagga  
cccataaccacagtaaaattatttgagacaaaacttcacagctatagcctatatacataaatattttgcaaaaaattatatcaataa  
attaagcagactgaaatagattgactaataacctgtttccgatcattaatattttgtttagaataaaaaaataatgttactatttg  
gttattataacggtggtagtaggtattcattttttgtttgtcaaaaatgcccttaattagtagctctataaattggacgtagcaataag  
caaaagacacagagaaaagaaag

**>Solyc10g075100.1**

ccacgcaaaaagtatactgaatagcattttctaagtgctaaaaattgaggttaagatgggtggttccttactttaagtgtttgttt  
tatcttctagttacagtgagtgagcaatgagatatgtctgtatatcgccctatgctagaatttgcaaacgaaaaagccttttagtaga  
agtcctcatgatcattaatgattttgttagcagtgctgtaattggtttctttagttcatatcaaaattggcttggtgttatgagaaa  
tccttttgaaattgctagtttggaatattgacatctctatttgaattaatatggagtttcattaagtattttatgtagatagactaac  
ggggaaagttcatagtgactactgactactgcgtattgtaatgagtgattagtcattagtaattctcaatgggaattgttgaact  
gttaatccaataatcaaatcgatagcgatcactaactaataatccaataatcgataaattaattttaactgttcaataacgggttaa  
atatgattacaaaccaataatcaataaataaaactgataaattctcaaatcgaaccacccaatcaatacacaacctcgattattaa

tacactatttaaacaatagtcaaaattgatatatgaaacaactcagagaaaatcaacctaaaattataggtcaaaaaataatcca  
atctggaaagggtcagtaaatatttttattatcttaaagaaaatcatttatataaaacttatataaactttataatactcatacatgtga  
aacatatccccacattatacaccaaattataggcctctaggtgaagactatatgtctcaaagaaatttctctgtgttgccctaattaat  
gagtttgggtgggtcctcaatctttactcaacttctaccaaattaatttgggaccgacacaaatttatactacatggaccaagagaaa  
gcatgtaataatagctgaattcgtggccaattagcaatcaacacattgtgcaacatataagaaacgtcaaagtgtcaggttctg  
tttctttttctacctgaatctaggttaaatctaggtctgcgcgattttaaaatgtgcattaaaatgtaaaatttgcttattatataattta  
tgtttcatcaattgatttgggtgatgttacactttttatctgggggttcacatgcacctccttataatagacgcagtggtttactccacc  
acatgagattttgcctatatgtagagctttgggtccatatatatcaataaagatgacacatgagttgaacagatatcattttaaagggt  
caagtcattagtaaatgttccatttttagatttaagcccatataattttataacgcatcactaacgtattatataatattccattcgtctc  
atttatgtgacactttttgaatatcgagattcaacaaaatctattttaatcgtaaatttttatacattttaaaaatattttgaattatgact  
tataatactttacgtagtttataagtatatatacatttcatttcaataaaaagaaaattccgtgtgtaaattactagtcaaaacttaaa  
ttgttgactcttaaaaaacgaaaagtatcttcatgtatttgatcgatgtaagactttttatcctaaattgcactaccacaaaaacagc  
ttttgacggtaataaatgctgacattaacaaagagtgttaaagctttacctgcattagttaaatgctgttaaatcaatgctgctaa  
agactttagaacatataaagagtgttaaattcccgtcaaaaatgcattattgtagcggttaattgtagtgttggtaccataa  
aaaaatgactaatatgactttataattaatgatgttaactcaaaatctatattaatgaaatgcctatttataaaaccaccgtcatctt  
gggtgattaaaggggttaagaaataactaagaacaaagatacgttataactattgatcgtgtattgatattttctaaatgtatc  
atttaataaggaacgtgttaaggataattttgaaaaagaaaatggaacacattttcaactttataaaatataacgtagtcattttgt  
atcaatttttaagagataaagctggtaagtagaaaaagcattaaagacttgggtgggttaagtgtctaaacactaatgaagacctt  
gattaattaaacgttgttgaatccagctaagaacgccagaagtaaaataaacttcgtcacttcccaaatttaaatttatggctgtaa  
aatatttaacttgaagttgtatttaaactttaatttttttttttttaaaagctataatcacatcattttattcttctcgtaaagattatc  
caatacaatttcatttcttaactctataactcataatttttttttaaaaaaatcttcgatcaaaactgttagagtaggttaaagctcacgt  
taatcaggaaataaactgatgattacttataaggatgtggacaatactcctctcataagctagcatttattattaaattagatctaaa  
aaacatatcttaacatgatattagattatattcattcctgtttgaattttcgatccacatctcaattggatctacgtaaaaaaagggat  
attaaagtaggttaaaagctctacattgatcgaggaatctatttatgggaactttgggtgagaaaaaaaactctacacgtaagat  
gttagaactagctaccacatgactttagagccagcaaaataatgtacaaccataaaaatgctttaattttcaacctaacaaccaac  
tacctctctcactcctccattggccatctactccaaatttcctctataaaaaactcaacaaaacacatttctctcatccactactcc  
tcataaacctcataattactatttcaattttcataaatcattaaga

### >Solyc10g075090.1

tttgaaaaaataaatagaatacatagctaataataataaaaaataatataatttatcttgataagctaattaagtgataaattaat  
tttttttaatatattatgaataatataaatgaatagagaaagtcgtattcattgggtgtgtgcgaattaatttctcagtcagtcgact  
attagattggcaatttgtgtccacctcatattcgtcaaaacttcttctattttctttttatattgtattaaaatttgactattttatattaaa  
cttagataatttcattcaaatcacgtagagtccttattaagagaaattaattcatatcgaagatctttgttcgattttaaaaggtgt  
gaatggaaaatgaagaattgagacttttatgaaaaattgtgattttatgaaagtttgcgacttttatgaaaagttgcgacttttata  
aaaactgtgacttttatgaaagttgtgacttttatgaaaggtgacgacctttctgaaagattgtgactttccaaaggtttgtgac  
cttttcggttaaggcacaataagaaccttttgcactacccttgttttctataaattgagggatttctctcatattaaaaatagaattgat  
ggacttcttctcaactactaaatctagtattctaagtgtactttactgtcgttgagtgttactgacacctgagtttttggtatctata  
ctctgatgattgagattttttaccctggaaggtcatattccaaatcaaacctcgatactagaggggaataatttccctaaggga  
cactgtgagttcagtagacttgatcttttctattaaaaattttcagattctggtacgtgctttacaaatttttagatttgtgaattaatc  
caattcttattctttgttcttactggttcattaaacttggaacttcgtgttttgcaaagcttgttggaatgagtaagattctttaga  
cacatattaacaacaattcttcttaagaaaaatatttcgtatattttttaaatctgtttctgattctagtttcgctactagtttaatttag  
cgataattaataataatagcttaattgtgacaaaacattttatttttaagataattaacactctttataaatattttcaagcctataa  
ctatagtacaccaatgataattaactaattctattatgttaatgataaaattaataattgtattatatctattaccgtttaaagtttgttt  
attataggggtggccctatatcctttgatggtgttaaaactctccacaaggaagaaggggaatcaggggacatgaggtttgacga  
attgttgataagatttgataggttagttataaacgatccaaattgaaaagtaaatataatttaataaaaaagatttttttttt

aattgagaaaattgtatataatgacaaactattgatttaaattagatgttaaaaccacagttctcgctctctccttgaaattctcgctc  
gacactctccctctcttgttcgccagtcctctccccgcctctctcgctttatacaacaaaaatgtataaattgtgtttctgtttgtacaa  
agcggaagaaaattgtatgtacacatgcaaatacaaatatgtttgtctatacactataattatacaatccaaatattctcatgcttag  
gtctctttgtctttctcttctcgctttatagaagtatagattatataaaatacaatgtataacagagagcaatatttgatataccaaca  
ttttatttcgattaaattgtatacaaaattcaaattatatacagatatacaaacacataaaattgaattgaaaggcagccacgagagac  
ggacaataatttatgcaaataatattatatatatataataatataatatatcttaaattcttttgatataatgtagcgaaata  
gccatagcatattcgctatggtgagcaaattatgcaactataactataacacacacacacatatatatataatataatat  
cttaaattctttatatatatatatgtagcgaaatagccatagcatattcgctatggtgagcaaattatgcaactataactataacaca  
taattataattttgctataggtttaattttgtatactttttcatgatcttttgaccgaaacaagcattgtattgaacatacaaaaa  
atatttaacatttataattaagtaataaactttacaccttaaaactcatttttaaaaaataaaaagtcataagcaaattgatttttaa  
ataaataaacattacaccttaaatccaatttttaaaagaaattaatgggtcatttgtttcaaaattaactcatgtaccataatattccac  
atctaacagtaaggtagtctgtctccttagttgtactcgagacattgttaatacaatttcatgtattgactttttacatcccacccttc  
tccttatttactctctttttaataaccactcttctcctgtattttttttctaaaaaaaacatttactttataccataaagaata  
aaaaataaatgattcaaagcatgagtagagccatcgaacacacatttttaagaaaaagattacgatataattaaattttctgac  
ttcgctactgtaacaggaaaagtagtattgggacaattgtggattgggccttaaatcgtgtatagcgtggttcaataaaaattag  
tcacgtaacaaacgaaatttgactttatactcatttttaactcttaactcccaactaattctctcatttttaattccactaatttctctct  
ataaatactcactagcttttacacctaacacacaaaacaaatacaattgtactactatatctataatctttactcaattttttataaga  
>**Solyc06g024380.1**

catgccacgtccaacgttgccgaccttggtgctttcaagggcggtgatttcatgcaacgcccacgctcgatctttcgtgca  
gtcaaagggcggtgatgtcatgctatgccgacgtgtttgaccgtgtgtgcagtcgaagggaggtgatgtcatgccacgccc  
gatgtcgtcctacagtgtgtgctgccaagggcggtgatgacatgccacgtccgaccgtgggtgctgtccaagggcgatgatg  
gaataccacacccgacgtcgttcgactgtcagtgctgtcctaaggcggtgatgttatgccacatccgacattgacgatcgtgtgt  
gctatccaagggcggtgatgtcatgccacgcccacgtgcccactgtgctgtgtccaagggcagtgatgtcatgccacgct  
caacgtcgtttgaccgttttctgcccgaagggcgataatgtcatgtaacacccgacgtcgttcgaccgtgtgtgctttcaaaagg  
cggtgatgtcatgccgcttgacgtcgttcgaccgtgtgtgccgtccaagggctatgatggcatgccacgcccacgttgccg  
accgtgtgtgctgtccaagggcggtgatggcatgccacgctcggtcgttcgaccgtttgtgctgcccgaagggcgatgatgg  
catgccatgctgacgtatgtgaccgtgtgtgctgcccgaagggcggtgatgttatgccatgccgacgtgtccgaccgtgtgt  
gctgtccaagggcagtgatatcttccacgcccacgttgccgaccgtgctgacgttcaagggcggtgatgtaatgccatgcc  
tgacgttgctgaccgtatgtgatgtccaagggcggtgatgtcatgccacgcccacgtcgtacgaccgtgctgctgccaagg  
gtggtgatgtcatgccatgctgacgtcgtcttaccgtttgtgctgcccgaaggtgatgatggcatgccaagcccacgtcgttc  
gaccgtgtgtgcttcaaaaggcgatgatggcatgccacgctgacgtcgttcgaccgtgtgtgctacccaaaggcgatgatg  
gcatgccacgcccacgtgttcgaccgagtggtgtccaacagcggtgatgacatttcacacccgacgtggttcaaccgtgc  
gtgctgtccaagggcagtgatgtcatgccacgcccacatcggttaaacatttcggcagtcgaaggggtgatgtcatgccac  
gcccacgtcgtttgaccgtgtgtgctatccaaggacggtgatggcatgccacgcccgatgttgccgatcgtgtattgatgttg  
gctacgcccgatgtgtccgaccgtgtgtgtgcccgaagggcagttatgtcatgctacgcccacgtcgtccgatcgtgtgtact  
gtccaagggtagtgtgttatgccacacccgatgttgccgatcgtgctgctgcaaggtctatgatggcatgccacgcccac  
gcccgtccgaccgtctgtactatccaagagcgatgatggcatgccacgcccacgcccggactatcttctgctgcccgaagggc  
atgatggcatgccatgccgatgtcgtctgactgtgtgtgctatccaagggaggtgatgtcatgccacatctgacgtcgtcgtat  
catgtatgccggccaagggcgatgatggcatgccacgctgacacgtccgactgtgttcgtagtccaagacgatgatggc  
atgccacacccgacgtcgttcgaccgtgtgtagtgccaagggcgctgatgttatgccacgcccacgtcgtccaactctgtgtgc  
agtctaagggcgtgtgatggcatgccacgcccacgatgacgatcgtgctgagtcgaagggaggtgatgtcatgtcttgccc  
gatgtcattcgaccatttgtgctgcccgaagccgatgatggcatgccacgcccagaagtcattcgactctgctgctgtctaaagg  
caatgatggcatgccacgcccacgtcatttgacctgtgtgctttcaaatgcggtgatgtcatgccacgctcgacgtcgttcga  
ccgtgtgtgctgcccgaagggcgatgatggaatgccaagctcgacattgttcgaccgtgtgtgctgtccaagggcggtgatggc

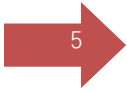

atgccacgcccgcgtcgtctgaccgtgtttgcgggtccaagggctatgatggcatgccacgccaacgtcattcgaccatgtgt  
gatgccc aaaggc gatgattgtatgccacgaacgatgtccttctaccgtgtgtaatgtcaaaggcggatgtcatgccacgcc  
caacgtagtcccaccgtgtgtgatgccaaaggcggtgatatcatgccacgcaggacttcgtccgaccgtgtgtactgtccaag  
agcagtgatgtcatgctatgcctgacgttgccgaccgtgtgtgctgtccaacggcggtgatgtcatgccacgtccaacgttgccg  
accgtgtgtgctttccaagggcggtgatttcatgccacgcccgcgtgtccgatcattcttgagtcagccaaggcggatgtcat  
gccacgcccgaagtcgttcgaccgtgtgttagagtccaagggaggtgatgtcatgccacgcccgcgtcgtcctaccgtgtgtg  
ctgtccaagggcggtgatggcatgccacgtccgacgtcgtccgactgtgaatgctgtttaagggcggtgatggaataccacac  
gcgacgtcgtttggctgtcagtgagtcgaagggcggtatttgcagtcacgcccgttctgcgcaggccttggcacatgccgctt  
gtctgcggacgtgtgcgtacgcagacctaatttccccttgacatctaactttgctttaaaaatcgcacacgacatccaaaaccct  
tattgtaacatgtcattagtccttaacatgacattaggcttgataa

## Collenchyma

### >Solyc07g020860.2

tatggaccaactacttttaaaatgactaatatataaaatgagacgaaagaagtactaaggactcgtttgatgagcttaataaaa  
gcagctttaaaaaagtacttttgaaagtgtgaaactttattttaaaataagcagttatgctgttgataaaaagtgtgaagttaaaa  
aaaaagttgttgatgtgtttggcaaataagtgtgctgataaacaacttttaaatcaaaatttctgaaaatacccttaaaagtgttaa  
cataataaaaagttatattaattttatatttacagccataaataattatatttctatcattcacatatttcttctcatcaaaattatttataa  
gagaaatataaacttattatagatttttaaagatatatcatttgaatagattaaagaacgatttaagattttatttttagttcatccataga  
taataataattgtctatcattcacatatttctttattatcacaaattatttataagaggaatataaaattttatttaagttatatgtgcaactt  
attttacattttaataatataatttgaattgatcacttgaaagatttaagattttatttttatttcattcattagtaataagtaattgtctatca  
tccacacgtgaaaagggaaaaatagaagaaagagatgttaggggtattgtgggtgatttgagattgtataaaaaattataaagg  
caaaaggtaaaaatgtggtcaacataaaacagcttataaaactgggaaaaaaaagcaccctacccaactataacttttggtt  
aaaaaagtttttttaacttaaaataagttattttgagtattgtcaaacagctaaataagtcaaaaaccagttttaagtcagtttgac  
cagcttttaagctgagccaaacaggctctaagactatcaaaaaaattcaagtcacagtgaaaataactataacgttgagttatt  
ttcttagttttacaatgatttatataattagaatatacttaagtttagttgtcattaatacttagtcatgttaattatgctaattagatt  
gttttagtgaattattgtattttaaaattatgataattctcattagaacttatttttgaatattttttatgcgactaaatatttttta  
ttagatattttaatgtcatcactcatatcatatttttaggactaaaaaaaatttaaagcacaataatattttagatgaatacttttc  
gagaaaatcctaaaattgaaagaaaaaaaaggatgaaaaagcctgattttattgattgatttggtttctagatttagaaatcca  
acacaaataattgagttggtatataaaaaaatccaaaccaattcaatttatatacacctctagctgttcaaaaaactttaatatat  
atatatatatatatatataatgatttaaacatgaaatatatttcaaattgagttattttaaaaatataaaagattcaggataaaa  
tttgaaaaaatataataaaaagtgaagagattttgagtggtttctacaaattagaatacaactttaattacggttgaaattttata  
gatataatcatttttatataataaaataaagtaatcattattgaaaaaagaaagtaaaatttactgcctgccaaacaagtccttta  
gatgacggaagaagctgccgtccaacctataactactactgtacatatccatttgaaatcgtaaccaaagtcctatcaacttagc  
cggacttgataactctatactctgacctttatgatgttaattataatcattttaaattatggatataaattataaattattataatca  
aaaataaaaataaataatgttaatttctaatttaaaaaaagtgagtcgctccatgaaatattaaagtagattttatacaaat  
agtgttaaaagctaattatgtcatattttctttttccaaattataaaaaaataaaatttgatggagttcagatacattcaaaagtc  
tgagatacattgcgtctcagtttcagcaacatctctcgacgtttgatcgaatctcaattttggatatacaacaacatcctgata  
cattgcataaagtgctgatttgaatgatacatcggtgtagtagaattcgaatacaattcaaaacgtcccaatacattgcgtctcagtt  
tcagaaacacccctcgagatttcaatacattgcggtcctaaattgaacagatcactcaacgtcctgatacatttcataaaataatgta  
ttgatacattcgtaagtaatatctcgacgtacgtcctaatacatcgtaaaatgatataataactgaaataaatatcacttaaaata  
aaataatttgaatttttccacaaagaaagaaattttgaaaaatagtaaataagttatgtattatctaattttacaaatccacttag  
ctttaattatgataggagaaatgatataatatatacacatatatacatatataataatataaaatatttcatcataatt  
tttgatatcgatacttttatttttaaaaaatagaatatataaaataatatacatgtgttataattttaatcctatcaattttattattaa  
atattaaatcgtaaaataaattacatcatatattctatttaattttccaaattatacaaaaaatattctacatgctatttagtcattac  
aataataatgatcgagatgatataattgtgtaccacttgcgagtatttatccttcgcccattataatttaattatataataatcc  
cacggacctcaaaacttataatataattattggcccttcaccttcgcaggaagctcaacacaaatctgtcatcactgtgcaatctc  
gtgtcaacctaaagtagcagaaaa

### >Solyc03g005000.2

caaaaaatgccaaactttttgtggatgtccgtcaagactttgtctatgcagccgattgggtctcacggacagtcacacccattttga  
agatcaaactagcctcaaagcgaacatatacccatttcgacgattttcgtgtgctatagcaaaccatttttgggtgatccggattct  
gacgtcaaaaaattccaaaattttgttgacgtccatcaagacctgtatattgtgccacttgaccatcacttccacttgaaccatttt  
caaggctcaaatgaaacctaaagcgcgcataccccctttcaacgattttcgtgtgccatagcaaacaatttttgggtgattcgg  
attccgatgtaaaaaatgccaaaaaattttgggaggtcctcaagacctgaatgtgcagtcggttgacatcacggccagtc  
gacccattttaaagggtcaaaacagccccgaagcgcgcataccctcatttagattttcgtgtgctatagcaaaccattttcgg  
gtgatccgaattccgacatcaaaaatgccaaaaaattttgtggacacctgtcaagaccttggtatgcatctggttgacttcacg

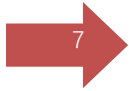

gccattctgacctatTTTaaaggTcaaacaagCCCCgaagtgtgcataTctccatttcgacgattttcatgtgctattgcaaaccattt  
ttcggggtatccgTatttcggcgTcaaaaaTgccaaactttgttgaggatattctcaagaccttggtatgtagcggtagccctca  
cggccagTccgacccattttgaaggTcaaacgagCCCCaaagcaagcataccccatttcaatgattttcgtgtgcaatagcaaa  
ccattttttggatgatccggattccgacgtcaaaaTgccccaaaaattattggatgtccgccaagaccttggtatgcatccaatt  
gtccatcacggccagTccatccaatttcaaggTcaaacgagccctgaagcgcgcataccccattttgataattttctgtgtata  
gcaaacaatttttgggtgatccgaattcagacgtcaaaaTtccccaaaaattgtggaggccttttaagacctgtttatgcagcc  
ggttgGCCaccaaggccattccaaccattttcaaggTcaaacaagctctgaatcgcataccccccatttagacgattttcgtgtgc  
tatagcaaaactatTTTtgggtgatccggattccgatgtcaaaaTgccccaaaaattttgtgaacgttctcaagtcttggttatgctt  
ccggttgGCCcttcacggccattccgacccatttTaattggTcaaacaagCCCCgaagcgcgcatactgccatctcaacgattttcgt  
gtgctatagcaaacatttttgggttatccggattcccgcgTcaaaaacgccccaaactttttgtggacgtccgtcaagacctgtct  
atgtagtcgattgtccctcacggccagTccgacccattttcaaggTcaaacgagccctaaagcgcataccaccatttagatgattt  
tcgtgtactattatagcaaacatttttgggtgatccagattccgacgtaataaTgccccaaaaattttgtggacgtccgtatagacctt  
ggctatgcatccggttgGacctcatggacagTccaaccattttcaaggTtaaacgagccccaaagcgcgcataccccccatttta  
gatgattttcgtgtgctatagcaaacatttttgggtgatccgtattccgacgtcaaaaTgccaattttttgtggaggcccttaa  
gacctgtctatgcagccggttgGcatcacggTcagTccaaccattttcaaggTcaaacaagctctgaatcgcatgccccattta  
gaagTcatcctgatttctgagagctttttccccaaaaaattacgtggacgtccgttaagatctgtctatggatctggttggtcacc  
acaaccaactgtccattttcaaactcaacgagccagagcacgtaaacccccattttacctttttgtgtgctatagtccaccattttc  
tttggtcaacagaatttccgagagctttttgccccaaaaattacacggacgtccgttaagaccttatctacggagccattggtcacc  
atggccccaaacagccattttcaaggTcaaatgagctcagagcacgtaaacctccattttgccgattttgtgtgctatagtagaca  
ccatcttcttttagtcattcatatttccgagagcgttttccccaaaaattacacgaacgtccctttataacttatctatggataggggtggt  
caccatggtcaaaacggccattttcaaactcaaacgagcccagagcacgtaaatccccattctgctgattttcgtgtgctatagt  
ccaccatcatctttggtgagcttcttaattgtgtgtttctttatctgttatgtctttatttatagaataatagtcacacaagttatag  
ttttatgttctaataattatgtagtgttgatacccaactttgacctccacgatttaattaattttcaaacttcttcaatttcaaatatcgtaa  
atctaaattactttaaattattttcaaggcaccgtttcatatagcttatatgtcacgactcgagagcaccagcgatttgacctcgaag  
aggttttatacaagcccctagcctccatcattgcatataagatagactaaaaTgatttttttaataaaaaaaatcaatggaagtt  
catttctaccattattaattttgtcaaatTaatttttgggtgagaacaagtgaggccattcatatgaggagccaaacaaaaaca  
aatgaattgagatattaagaaaaaattgggtgtgagcaagagtagagtgggtgtgtggtgagcaacaaaacaagTctcttcatct  
tctgttca

**>Solyc10g006790.2**

ttctaaaaTgtgtctatgtaactctacaaagagtgaactgaatacaacaacacaatgagcaacatagattagaggaagtaaaa  
atttcattcacaattacttctaaacaaattccagaagtagaatttttttccggggtctcttttttaaaaaaaactaaagataac  
gaactacatgaatcaaaggatacgaagttacacctcacaattaattctgaaaaccaagaaaagaaatacaaaaaacaaaaaca  
aaaacagttcaaagaaacatcctcttggggtttaagaagagatctgtcatttgactaaatgaccaggattatcaacctcaccat  
atacaaaaTcttagccaatgttgCGaaagcagggcctttatagaaaaTctgccaccattcatctctcgtgtgtatccgggagtc  
tcgtacttgtaacttgagtgaaaaaacaattaaTcattacacgaaaagaaaaccagaaaacataacaatatagtcagaaa  
aaattagctacatacctgttccctgtactgctcgtaatgtacctatacattgaccaaattagaagaagattaagtaaatataaca  
ttactcgtagacagaaattgagacattaatcaaccataaaagtttattaacactgagaacacacctgcgagggagtgaggagtc  
aagaggggaaaagacgaagggcgagggaatgaagagcacagatgacttgatcaacgtgtttggcatcattgattgaggcaat  
gacctgaccaccttttctagtacctctcttttgccttgattctgcttctctccatagaccccagaggagtttcttctcattttgct  
ggtttcagtagtaataaattggaagtttagtctctgatcgTcgaaaggattaactggattaacaagagcaacaagcattat  
aagaagcttaacgtatttgaacagaaaaattaagaagTggcaaatgtactacgtactacataaaaaaaatagtctgaagaa  
ccaaatgatacaaattcaacaacaattgcttttaatatctcttacgcagaccaattccaaccaaacataactttatcatcaggaaatt  
acacaatcaagattgaagaacatcaacgccttattaatgtcagtaattaccaactagaaaTcaaaccaaattgttactaattcaac  
aaaaattccttttttttaaatgagaaggaaacaagttgtatatataaaaaatcagtacatgggttttacgtgaccatatttacaag

taaacaaaaacgaaaagagctaacacaccaatctacaatcctataggaacctaatatgtctaaaaatagaaatgttatcttccgcat  
aatccaaatattgtctctcatatccagtatacagaagaattttccatataatcataacttcagcaccgtgagccgagacaaaaaa  
aacactaggcgattttcttcatctgttctaacttggtagacaattacttcatacctgttccgctcttagaattagtcgagctgcgcaa  
aatgaaagctgccaaacaccataattatccaaaaataaaaacataactttccttagcaagcaattataaaaccaagattgaaga  
actccaacacctttactactgtcagtaataactaagtagtacaaaatacaaccctagatgccccaaacccaaaatgaaggagcatt  
tatacagcaacacagacaaaaaaaatatatcaaaaatcaaaaaaaaaaagtccatgctaccaaacaactgtattttgcatttgg  
gttttcaaaaactcattaattttcattacaatttcgacgggaatcttaccggaaaaagtgattcttgctcaccggaaactgctcaattg  
atgaagggtataggcttgaaaaatcccaatttcataatttctaagttttatatttatatgaagggtctaaatattaaatacttt  
gtaaatttaactccataggttttttatatatttgcgttttaaaaaatatttgactaatttaaaattaaattacattatattgatttga  
tattacaataaaaaatttagatactcaaaattgaagaagatactataaattataaaagaaattcatattataaaaacacatcataaa  
atataaattaaagttattataatttaactctaaaataattataaagttcatgacaattaaaagtgaaatgaataatattgattttcg  
aataatggtgctcaaaagtggtattttttcacttctatttttttaatatatgtaattgaagtgcaacaaattgtgttgaaattg  
taatatatacttgaggtttgtatttttgcgaacaaatttgatttaaaatttgttgaaagatttttaagttagaaaagatga  
atttatatatatatattcaagtttaggatattttttaccaacaacctaataataacgtcaaaagattaataataataatatttt  
atctaatatgcctatgaacaaccctttactacgtaacttaaaataatttttaaaattaagggttctatcgatgcaattttaaataatcg  
aaatttaatacaggtatcggacattaaaacggatataaattaaataatgttaaaatggctagttgagtaaaatgttcaaaaagaa  
aatttgggattcagaatcgggtcattgccaacacacttacaaccggtagattttcagtcactttctcctcgacggcgacaacc  
caaaaccacgtggtgcagctgattttccgggtcaatacgggtgcgtttacttactattgtagtggtcatccatcgactacggtttc  
gaaaattcatcgatgatacattttgtgcgaagggtgaaaaatgcgggtgatcaatcagctttgtatcgtagaagacctatcagca  
tcagttatca

>Solyc09g013150.2

aaaagtattagttatagattgggttttggtttagtggcttgataacggtttgatattttatcggattatcgattcttaacggttt  
gaagtttttcttaacgagtttaaccgataacccgataactaattaaataattatattgtaccattttgtatagaagttctcgacttaga  
gtttgatttctgcttttatttttgtgtctcaaacacttggttattcaacaatgtaaaagtgctgttttgaccaagatgtaacatgtg  
aactcaagtgcattgatttttgggtgtcacctgtttctaagtaatttttaattgtttttctttgtgcaaatcttaacggttaaacggat  
aatcgataacaatgaagaaccgataaaccaataaccgataagtcaatatcttaataattctatagcgggttagcatctctacaaacc  
gataaccaataagacaacccgataaactttaaaatcgaaaccgaaccgactgatacgcaactctacttcattaaaaaaaaaaaaaca  
ctaagttgttactacatcgaaaaaaaaaagcaattccacaagttgttactacatcgataaaagccatcaaattagtcatttgaccg  
aatctttgaaaacatatttttaaatatttttaaatattcaataaaatcttagatcaactctagaaaagaaatcacctagattaaca  
gaactttgattgtactttaattttcaaaatctctaatttttaaatattcaagtttatgaccaaattgtgaacggaagcattaatccatattg  
atattcaactcgaaattgactttgaaaaattgtaatcaaggtgattgtaaaataataaaaaattactctcaaaaaagtgaaataatt  
ctcgtggctagatcattttgtcaactactgtataaatttaaaataaaaaatatcatctaataattacttttaattttatcgaaatttgaa  
tactaatcatctacatattttattctagctattataaacgactagtaagtcaccttatattttcatagtcatttcaattatacaaaatttaa  
aatttaccatatagatttttttaataagccattagaagttattatacaaccaattataaattcaaatatcttttgccatctacctttcag  
gggtgtgaaagggttaggtgaatctagagaacttaaatagatttagcatttcataattagtaagtaattaataaagaaaggaaaaat  
ttggaagcacgtgaatttttttggaaaaatcttttgatcagtttaattgatcagaatgataattttatccttttaactttaatatctttta  
attaaaaaattaaaaagattaatatatttttaaaataaaaaaagatattatagacttttaattttatagccaaattgttgatcatttag  
cattgtcctttatttttttctcaagaacgatcgaaaagcccttgaaacattgattataatgttatcaataattgtactaatttaattac  
gtatattttttctacaaaaataaatgaaaagaaaaataatttgcctaagatttttagaaagcgattttttataaagagcacaaga  
aaatttgaaattttgtatgtgattgtgattttatcaaatattcaattatgatgtactacatcattaacaaatataattccatcacaaatc  
aatatctgtaattaaataaaaaataaaaaatgtgtgaataatagttcttgcctccatattaattatgtgacgtgtgacgacctaaa  
tacttactcacaaaaataaatcataatttgggtcaccaaattgttttttaattatttttgaagtggtgcatagtcattgtataatatt  
ttacgtaatagtaaaaagatttttataaaaaatccaacacacacatcaaaactatagcttattttataaatgacaaagggtggttag  
attaaaactaatttataatagttacacgcgcattaattaattaaagtttaatatattaggtgcattgtttgctttcttgaaattaaaaat

aaaaatatacacgggtgaatattatattttgagatatcacattttgattgttattggagaatattttttatatatatctataatatta  
gaagttataaattcacatattccgatataaatacttttgtgtatgatatacacattcaatgtataccccaattctatagatgaatgaac  
cgtttttgcatatagattttacatttactcatgattactcaacttattaaatcacttcattgtagtaaatttatataattcaataaagtaat  
gtcatgtgtatatatatatatataactaaaataagtagtttgattgacgagacgtgataaataagaattttcaagaattaaaa  
catcacatgattttttatcccaggaataattaactaaaataacaaaataaaataatcttctaacttatcaattacataactataagat  
gagattatcatcataagatatttcgaaatctttattcatatctcacgaatcaaatgatccgaaatgtcatcacaataatagtagctca  
tttgttcattcgtaatttaaactcggtcacatgaattaagacgaacggagtaattgttttttaggtgttaggttaaagttttaaatgg  
acaaaaataccctcaaagagcaaaaagtcatacaactcaccaactttcaacacgcacgcaatttcttctcctcatttcttcac  
cagaaaatcaatttcttatataaatgcattcaattaattcttcaacaaccccaatttcattactcttgttatagttaataatctcaaa  
atgctttatattaagagcttggtatagaattttctacattactacaaaaaaaaaactcattctttatccactttattcaagattcttct  
cttcaca

>Soly01g105040.2

tttaattttatgaaactctgatgagtgctgtttctgtcaatccaggcaatggcccaagttggtggcttggttatgctccaacctgaa  
gttgagggtctccaaacagaacttcttctgtggtatagacaaagtaaggttcaggaagccagtgattgctggagatactttgg  
taatgagaatgacactgatcaagctacaaaaacgttttgaattgccaagatggaaggtaaggcatatgtaggaggggatgta  
gtctgaggggtgaattcttgatggctacaggcagtgaaatgctgtgaaagctactactaggaaacttttagcatctagatc  
agtttttctccatccagctgccccattaatgttaaactaggagattatctcatttttcttatctgaagaatagttgcaatctatga  
gcttgcttcttctgccaagataaacaggatgaatgcgaattctgtatctatgataagggtcccttcttcttgagtgcattgttat  
gacaattatgattctggttatatgaaaatgtttcatcttaaactccaggaggcagcaaataactgacaactctgccatctggttga  
attatttagttggaagggttgtgcatcatttaatacaattacattgtgactgcaaattatactcgttctgaaccagtttctcaatt  
taagttatgattattgagtaatttaattggaacctctactaccatattgctacctctgcattgttaaaatttatatactgttacattgggc  
tagagcataaagaagataactgtatcaagaggaaaaagcttgaagtgacaaattcaagctttggttacttcttctacactcaac  
ggctcttccacagtgaatgtttaatgtgaatctcttcaaaccaagagctccaaggggtgcttccctgtccagcctcaaaatag  
aaaattaacatggctaacatagcaagcttagaatgctgtatctcagcaagctttaatctcgaagcttctgtgtcaggagcgtaa  
actccattgttaagtgtaccagctaattgccaaggatcaagaatttgccaccagggtaacctgttcgcctgtgaagttggcaa  
agttctcagcagcttggaccatggagtggtcccaatctatagactgagagtcattgtcgaagaagtcgacccacctttgtctca  
acccaacctgaggagaagctgagtgccaagaagtgcgcaagagaaaggtgcaatagcgccaggatcagcaccag  
cctcaaacctggaatgccactccaggcttgaccaacaagatgcccaatacagcagccattgccatctgccatgaatgagctc  
agcttctgtaccattcaagaatgcagggtccttgccaagaccaagtgggtcaaaacaaagtcaccagggagcctgcaggt  
acaaaatacaagggttaagccttgcacagaatgaatgaacaagaggagatgagggaaataaactgtgtgtatgtaaaagta  
aacttacgagccatcgagccactcgggtcaaccaagttgccaccagattttacagcaggaatccaagatttcttggagcaaca  
gcagcagctgccacaacaaacctcttgggagtggttaactctggcagtaacatgagcacctaacaaggcttgagtttctgccac  
cagtcagaagaaggagctcaagccattcagcactgcagtagcagatgtggtggtcatgttttttgatagtggttaaactgc  
aaatacgaagtttctgttttgaatattgaagtgcattcctggttatatggtcatgagatcaaaagaggggcaaatagtagtagc  
caagtaggataaacgaaatctgcagatgaaatctagtggatagatttctgaccaatgagatgttgagctccatctctatgtcccct  
attcataaccatacacgtggacacctctctgaattctcctctcttaataagaagatattgggtccctaagaaaatgacatcttagt  
gaaaatagagaaaaaagaagtttgaatcaacattgcgcgtaaaaacgaaaagtgcggttgagaatggtagagtgatacaca  
tctttattttgaagagaaggagggtgttctcaaaaagccttagcttaaaaaggaaccctgccaacaattgaagaagggga  
tgcatatgggacaattacatcaacaccgttaatatgaagtgaaggtattacaccaacaacaagagaaagagtattaatgag  
aactaaataatgcaataatcggtgcaaaaacaactagtgaagccgtaattgaagtcaagaaactataagagtagtgaaag  
cttatccgataaaaaagaaagaacactcaactatctactaacctgtaccctaatagcataaactctaaatactgagttgtttgtcattt  
tcattaagttgtaggcacaataatttaattaaacctcaattgtaaacctattttgtagttattgactccaaactaatcaactgc  
aaaaggtgaccaatggacttaagtattaggacaagtcaaattaatcatgtcatcattaaatatatcctatttcatcaagaacctac  
aaacacatccatatctgctcatttaggacaagataaaacaatcgaccaactaaagtatagagcttttatgttcaactcacgtatcttt

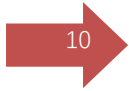

---

cgttacactcattcggttacgcaacaggctaagccagaaaggaagataaactgagttactaaatTTTTTTTTcatgaccctggca  
atttgagtcataataaggtgttagtgtaattaatTTTtcattaattcaccattccctccccttgTGcaaaacccacagtcaattgcc  
ctagccccaaccatatatgcaacagaatttcaaactcacaatcacaacacactt

## Parenchyma

### >Solyc07g049140.2

aagaccattttaagacctaatttatcagtgactccttaaagttggcacaatatttcacttagacaccctaattgaatgatgttcatttta  
aacaccaatgtaggggtccgctatatcattttgacacatttcttaacatcaacaaaaatatataatgagtatgtgatatactcgga  
atgacgtgaaaaatgaagacatttgttattgtatcaaagtagttactaaataattatttgaataaaaaataaaagctgaccagta  
aatcaataacacataatattttccacctaataataaaaataaaaaataaaaaagagccatctcagggtcattctgccaccattgctat  
ttcaaagaaattgtacgtagtttatagaaattgatgttaaaattcttcaagaaaaattatgaatgaattattctctaatttaaaaa  
tattttctgttattttgttgaagaaatttaacttgataaaatggtgggttaaaactggaaagaagaaagagaaaaataattaa  
aaatcatttcacgctctaataatgagcggtatcacattcattatgttatataagcaaaagtgcacaaacgaaaataatattacatg  
aaatgtctaaaaataatcgctctaattaaaaatatctaagtaacatattgtgcctaacttagagggatcatcaataagttaaacccc  
attttaataactcataattgtcctttttatattaattgtcacaaatcacaatgataattaacattaatttgccttgtgacgtccatattca  
tgcatttaaccaatcatcttcatttggacttattatcacaattatcccactttcctcacaaaatggagcattcaagtggatagactaca  
cgatttttaattcatcaaaaacatcttttgccttattcattattatattgtcgctattgttgaattttatttgcctaatttcttaccataaa  
tagatttttcttttagaaaaaggagattgactaattcttttctgtaggaaaagggttaggactctataatagagacataattccttcta  
actaatcaacatttacaatgtagtctaaagactttgaaagttttggttagggggagaaattgtgggtcacaagcttgatagcgtt  
atcaattgtgtaaacctcccattgattctgagtgaaattggttaggggtgttccctctgtattttgtactctcatatttatagtggattgtt  
catctcttcgtggcagtaggtcgattgaccgtcgattgaccgaaccacgttaaatctttgtatttttgatatatttctcattatcttctt  
actcgtgatctttcaagggttgattgctatctccgctgtacaccaacttattacgatcctaacagctatgggtgtggaacataaat  
caaacattttactgatataaacacatctttgattataacatgatagaaatttgagcccaacttttatcatcattatatacaaaaaagttct  
aaattttttttgatgtagtaaaacttaaatccatagtcttgccctaacaacatgacataatatataacccaaaaataactagttttcg  
ccctcgagccctttaaagtagtcaatattacgggtgaccgtgaatttcttaattatgatataataatttaaagaaatcatgatca  
cattctactgatgagaacatgtgctaataagggaacatggatgtgaaaaatacttttgttaaaagtaaaaaaaatgtgaa  
attttgttagttattactacctatacattatttgagcatgtgcaaaccttcaaaatacctaataagaagattttcacctgcctgtatatatg  
taaattaattataatgaacactctcacataaaaataattatcagtatatacattaataacttgcctccacaatgaattaaataaaatgtag  
aacatgatctacacttcaataaaaactaagaccataaagaataatttcaaaatatacacatgtcaacaataaattatttgcattattat  
taacttactaaacaatctttacttttgaaatataaaaaataatcaagttataagtctgctcaaagtaaagcactgttagactcatctgat  
tttgagaaggtaagcaaatgatggtgcataatagtcacaagtaaaatataaaatagatttcattagtaaaattgtttttactttcttt  
atatataattatcaatatccttcaatggtaggttaattatattgttaacttctgttgaattaaagcaataagacaagaatttaaagat  
aaaagaacaataaaaaatagaagactaagagataagagttttcttattcttcttcaataagtatcatcaagtgatacaatataaat  
ttttgtattttgatctatctattataatgttatataagcatacaaaagatcagtcataaatatgactttaatcatgaaaataatgaa  
agagattatgaaggcgtaagggttactagaataatagtcattaaaaaaaggggttatctttataattgaataattgatgaagtaatg  
gagataattagtgagcataaatttttaaaaaaatggacattacactataatattttataacactttcccttaaacatctagggtataa  
ataatgagtcctgtcaaaatcttagtaggaaaaattctgtgaaatttttttagtgaaaacaaatgatataaatatcttgaatactcatta  
ttgtgtctcattaaaaatcttatctgacctataaaaataaattttgtcactcaaaatagtttttcattctaaaattagttataattatta  
gtgaatatttaataacataattgtataactaaggggcctataaattggattcttctcaagaaaaataaaatcaccacacaactttctt  
cttctgctcatcaattagcaattaatccaaaaccatt

### >Solyc04g007770.2

ctgaatattgacacgcagtcactcacgaccaccatttccatatatagagaatttgccttacctattagaaaaacaatcggtgcatt  
atagtaaattattaattcaaaataaatgttatagttgcagttccatttaatttcaattataataaatttctgtcattcacctctctccta  
tctctggaatctcgcttgcattctcctgttttcaatcatctgtctctcgcttctcgcctttatacaaacacgaatgtttaattgtgtttg  
tattcaacaagagagactatatatacaaaatacaaatcgtagctctccctcgcttctcactcccttcttctcgtttatacgaata  
caaattatgtaaaatacaatgtataattgtattgtataaagtgcagaaaaatattcgatatgcagatagaacgtttaactcga  
ttaaattgtatataagtttaattttatgcagatatataacacaaatcactgatatacatatacatatagtagttacatatatacaatt  
atataactgatcaatatacatatataattcaactcttctactctctgccatctctcactcgcttaactctctccaatctcgcatataca

tacacaaacacaatttacatagacacactaactagcgacacaatttatacaaatacagatattccataacaaatataatttggttattgt  
 gtgaaataacaaaattataagtagagcgctaataataattttatctttactattcctaagatttactcaatttcatagttatacataa  
 gatgtactaattttcaaaataaaaaataaaataaccactaaaacataatttgtgcaattgagttcaaaccaaattgattgaaaga  
 ccttttaagtattgttctcttttatagagatgtctaattcaatattttatctttgcttttattccatttctatgtaataataacatttaaattca  
 atatcggttcagctatttcagtggtatatcttattcaatgttgagtgccattgttcatctgttggtgccatctgtgcttctatttctatattat  
 atatataaaaaaaattaaattttgtgtccatctattttatttctatgtcaggtctaattgtctacttcatggcgtgtttgtctacgagtgat  
 atcacgaagttttgagttgttcatgccataatttcgcatgaactcttgagtgcaagtattctggaaataattagatcattgaatccttgagttca  
 ttgagttgaattgttcatatccataatttcgcatgaactcttgagtgcaagtattctggaaataattagatcattgaatccttgagttca  
 ggagttattgagcctcgagattgagttctacgtatggttattgaaaatcttgaaataagtcattcacgtccgtaattcgagatgaac  
 tttattttaagaagcttttatacaaaattttctgaactgttttaagacttgaactgagaacagtagagtcgagtttattttctttaaagt  
 atatgtgagaactaagtatttccaagagtaaatgtttttacatttttaaacgaggaggaaatcgagatttccaaaagaattttgaac  
 agtttgagtaacatctcttttagagaaatattttgagtaataatctcaaaccagagaaagagttatgttttaacgtatgactgagtt  
 tatttttgggagtagtggtgagcaccgatatggggacgagttcaggtcactcaagtctccataaacatgtatccaaaagggcat  
 acttttagatgattccttactgccttttagcatagactagtggatccacttagttgagaaattccatacctcgacaaagtataggaca  
 attctgacagcatgggagacactgtatcatcgtatagctcatagtgatgatttctggttagagaaactcccaaaaaattattttgt  
 attttattacagatagagttattttgtattcttgcatagaacggagtatattgtattcataaatacattgagttgctacctatttctta  
 aaagctttcatatatgcatctttttattgtttatcttgagttgagtagctttgagttgagtaccagaattgagtagtcttatcattga  
 gttgaactatgtttctattttgagttgaatttagttgagtgagttgagagaacgtaattatgtttcttttatcaagttcaagcttatat  
 ttattctatagaattcccttacatgcttgaacataaccagtagctgatccatttggcctgcatcgttcatgatgcatgtacaagtatcca  
 ggatcatcaacaaaaacttcattgatcatatagagtttaagttagctatggtagtctccttatttctgaaggggtccactgtactt  
 tcagttatatcaattgttaggatgtcgttaagtcctgctccgacttccatctttgtcagtttagaggcgtcatagatagacaatagggtt  
 tgagaagtctgttctatttcttataaaactttacagacttgagttgcctattgttggttagtgatattttatttatattcaagtaa  
 atcctttaagttaaagctttatatttaagttattgattttattcagttatagattttgtatgattgagttagttctgcgttatagtcaacca  
 ggataagagtttagcttggggacaaacaatagctcttgagtgctggccacgtccagaatataggctcgaatcgtgacagtgcac  
 gcatgcatgcgtgcctaattcaataatagtgacgatccaacaacaacaacaacaataatgtgacgtgttgaataatat  
 ttttactagctaacttctcacacaaataaaatctttataaagggttaacaatgttcctaacattttctcaccactttcttccaaaaattat  
 tgaattgaataaaat

#### >Soly09g007940.2

tttcgagttgcagcctaaggaaggacttgcaacttggaatggtactgcagttggttctggtatggcatcaatggtactgtttgagtc  
 caacattcttctgtcatgtctgaagtcttgcagcgattttcgctgaagtgatgaacggaaagcctgaattcactgactatttgaca  
 cacaagttgaagcatcaccctggccagattgaggtgctgctattatggaacacattttggatggaagctcttatgtaaggcag  
 ctgagaagctccatgaaatggatccttctcaaaaacaaagcaagatcggtatgctcttgaacatctccacagtggcttgacat  
 caaattgaagtcacccgtgcagcaactaagatgattgagagagagattaactcagtgaaacgacaacccattgatcgatgtttcaa  
 gaaacaaggccttacacgggtggaaactccaaggtacccctattggtgtgcatggataatacaagattggccttgcatctatt  
 gggaaattgatgtttgcccaatttctggaactgtcaacgactattacaacaatgggtgcatctaatctcacagcaggaaggaa  
 tccaagcttgattatggactcaaggagctgaaattgcaatggcttcttactgctcagaactcaattccttgcaaatccagtgac  
 taaccatgtccaaagtgtgagcaacacaaccaagatgtgaattcattgggcttaatctcagcaaggaaaaccgctgaggctgt  
 agacatcttgaagctaattgtcatcaacctatctctgtgctgttccaagctatcgacttaaggcatttggaggaaaacttgagga  
 gtgctgtcaagaacacagtgagccaagtagctaagagaacttgacaatgggtgctaattggtgaacttcacctgcaagattct  
 gcgagaagggaattgcttcgagttgtggacagggaatacgtgttgcctatgctgatgatccctgcagctccacctacccttgatg  
 cagaagctgagacaagtcctgttgatcatgcaatgaagaatgggtgaaagtgagaagaatgtgaacagctcaattcttcaaaa  
 gattgtagcttctgaggacgaattaaaggccgtgttgcctaaagaagttgagagtgaagagctgtgttgaaagtggcaacc  
 tgcaattcctaacaggatcacagaatgcagatcatatccattgtacaggttggtgagacaagaacttgatcagaacttttgaca  
 ggtgaaaaagttcgtaccccggtgaggagatcgacaagggtgtcacagcaatgtgcaatggacagatcattgatccattgtg

>Solyc01g096270.2

aggatcatttttgttttgaatccttgcacaccttgcgatcttgatgtttacaccttactttatataaaagtagaagttgacaattc  
agtaataggattgcttatctgaagacttcccataattaatatggtttatatccaacaatataagctccaattttcattttatagggttg  
gagacctatgtagtggaacgaggaaacccgaaaattagaagtgagtagaataagaaaagcagactatgaaacgaa  
attaagacgtgtaagtaagaaagatgcactggacattttctaagtaagcattcggttaagatgtggctaaagtctctccgagg  
tagcgatatattacgctcaggtctctcaggttcggttcaattgaatcacccgatattttttaagctatagactaaaaagccaaata  
cttctcctttttgacatatttatgatcattcaacttaacttccagttcaggtccttttagacaaggaagattgcttatgacatcaatca  
gctagggtcatcctgtgtcaaatagtttgcaatgtatacttcttttctatgtctaaagttagtttatagaaacttctctgatgagcgcaa  
gcacctttgatcacatttctagtaggttagaaaaagatagtcatttgcaggaagaatcgttcaaaagcacgggatggaaatcc  
acagctctgttctatccactctcccaaaatctctactcgtaatttacccgaaaaaaacatatagaaattgccatttgacgggcaa  
atagaagaaagaaatccttttacccttcattagcatttactgtcaaggtagaatggagtttcaggtagggggataagaaaaag  
tagtaacagaaggggagaaaggaatagaacattgaagatagagaagggtgaaaagcgagaggtagaatgaaaagcaaag  
gccgtatagtgcataaacgggtgcatacaactccggaaataataactaaaggaaatgaagtaaccatttatgttgggtagcatca  
aaagggtatgaattgtaatgagatggatggggatttgggacgtgataagtcataaaattgagtgatgaggggaaggtaacaa  
caataataaaaatattaaagtaaaatcaacattaggataaataactattcgttttctatataacaactaagggactgttttctcc  
tctcccattgcatgtcatcccatgacttaaggggtcataggattagaattaagagaagaaaaatatgaatatgctgaagtaaggt  
gaattagaacttttagagtagtagcaccaaggagatagctggaaaacaaaaagaaggagaaagaaagaaagacaaaagg  
agagaataatgtatagagtgttaagtactgggtctaaattctaaaaacttttggcatcggttgaatatcaaagtggaatgaactt  
ggaagcttaccttacctgttgggaaaaagaaggaaacataaaagtgaaggggtcaaagcaaactcaggtatgaaagaatca  
agataaaaaagaatgtcttctgagaataaattgggataagagggtacctcggtgttgggggtattattgtttacattaggg  
gaaggatgctagaaaaaaataaagaaactaaagaagtattacaattgagaatgttacaaaaggttaaactaaattcataaatt  
gaatgtttgtctggcagaaaagatagtttgggagactccagtatatctgtttacaaagtatacagtaaaaaatagaggaaatat  
gagatataaatttagatttgggttccaacagtttaactgagataaagtctgtcagggaaaggtaatacaatttgggtttatttcttcta  
tatttgggagtgctaagaaatcagtggtacttttaacttcttctagaagaatattatgcaccagcatacaatggcttcttcaactgga  
cacaggacaatgtcacggaggtagaagaaactttttattgctgttcttaccagtagccttgatgatatcacaggtaaatgggtga

aggcttgtagctgtgctctttcattggacaagctgtgtgacctgctctgtgattgtacttctcccaatgatccgttggtatcagta  
acttctaaatcaccattgggttccagctagaacaattattcattatctcttttcattctgacacctgcattccctgattgcaacttc  
tctacaattgtaactattaccgttgatcaagtcagggttacaagaacactgctcaacatgtaatgagtagcatgtatatatacaaaat  
acatggagagaagatttggcttggacagagaacagctctgtcagtagcctagccactgaggcataaaagtgttgaccggaa  
caatagcttggactatgtgtgctgagggtttaaattgtccaatttagtgttactggcttgatgcaattgtagaatggtttttg  
atgttcttaagatttcttagatgttgaacaaggatatacaaaatctagatgaacaatacatgagcacctgaatctgtaataataca  
agtttgcattatttttgggttggacatactcttggtaaaaaattataattctcgtcaggcattcatcaaaacctttcatctggagg  
cattatattagggtgtgttttaattgtgttactattgttctcatttaattccatcctattgtctcttgattccatgtttgaaaactctat  
gttaggttatgatgaacctcttttggatgatcatcctggagggtgatgaagtgtgctaactgcaacaggtaagcctaaaatctt  
ggtaatacattgggttgcgtgaactgaacttagatgtgatacgtataaaattgtgtgatataaggcaaggatgacagatgat  
ttgaagatgtcggtcacagtgatgatgaagagag

### >Solyc01g067730.2

atatatatgtttctaaaattcacaataaaacatgatcaaacgtctactacgtatataataaaaaaacctcaaaaggtagctttagat  
attcaagttgtggttggagagtggttggtacatatcaattctgttttctgtgtgattttataatgttctcaaaagtatatatg  
tgaaaagcaaaatgatgtgcatgtatatatgagggttaggacatccaaatttagcaaaggggaaattctggttggtgttgaa  
ctttattagtaacattatcaattaattagttctctaccatgccataccccacccccacccctaaacctatctactactcttggcac  
aacctatttttctaccaccattgattacttgaactaagcttttaaattttcaaacattctaattagtaatatctttctatatattagta  
taactttatatcatcgaaaaatatattactattttcatctacatgttttatttctaattagtaaacatctttttatggtagtataatttatatc  
atcgaaaaatatgttactattttcatttgcattgtttatgagaaaaattttataatggagattttgatctcattaggggcatatata  
gggggttaggggaaggggggagcaccgagaggttgcgaattcagataaattcattcttttcttttaattatatatgtagtggtg  
tatttttatatataaaagaatacttaaatataaattgtgtaaattcatgctcaaaaatatatctattcacgtaaattgtagtgccacattc  
attataagtttttgacaaattaaaattggatggagatgtattgtttaataggatatattagaattggttagttgaaattcataaat  
ttcagtagataactctattagaaaaaaaacattttatgaaacaactttattataaagttatctaaccaaatcttctaattcaaaattc  
tccccaaaaattgtattggacatttatgttttaagtctgcaggattttctaccctaaaatatggaggatatttattgttttatatttaaat  
ctcaaaagaaaatactttgggttattataaaataatttatttctaatactagataaaaagttagcatcccaattttgaaagattggat  
atatcacaaggagaatattttaactttgaggaattttgattcaaaatttgagatcgatttgggtgatttcttaaggaatcaagcaca  
catgtatattgattgtattcatgtatattcgagtgtatctgttcgctcttatacgtttatatcagtatatttgtgttttttacggtgtatatat  
tatcaaaaatatattcaagaagtaatttaagtgtagatgtgccttgttatcataatatcaaaagtatttaagtgtatatgttactgat  
tataaattgtatcaatttactcaagtgtatatgtttctgttatactttttatatcaaaaatgtattgtttttgtttgtacctctatacattt  
acatttgtatcaatgtatcaaatgtatattttctgttattcattttatatcaatatattgaatattctatagtgctccatcattagaatc  
aagatgtatttatcaatgtatttagtgaaatttcttttccgtaacaactgcaaaatttatataccaatgtcttttaggtaataatcagt  
tgctataaaatcaacgaataagaaaaatctagtagtgaaattcttttttaattatggaaatagctcgcgaagattttaagtcctg  
ctgattagaaagattgagatgttaattcagcgttgctaaattatttttttaaaaaagatattatattataaattaatgcaatgcactcgc  
tagccacttttatcaaaaagatactttaaatacatctataaattgtacatattaattgaattgttgaaattttttcaaaattaagttaattgt  
tcaatttcaagactacttttaattatttttttcaattttacccttcattagtttagtattggtattagtataaattaaagtttagttattta  
atcataatttagaataagtgtaaaaaaaggaaaggttaaaagcctaattcatctcttaattcttctttttaaagggtataaaagcatatgaa  
gttctcaacaattcaattaatttttaaaaatgaaaaattacataaattgggtatatttaataaataaattcatgatttaacgatacttttatt  
tattaccatttatagcaatattatgttaaatctgcaaatgaattaaaagtgattatgtatgcaatatatatgaattataattgttttttg  
aaatttattatgtttatttggtaaaaatttgacacacattttattataaatgtattaaaatgtgtgataaattgtatcatccatcattaaaac  
ttgtattatgtgtgaataataaattgtttttataatgtattaaactgtattataaataaataaataactgatcaattaaaaaaattatt  
gttgctataactgataaatatattattatacaatatattatgtaaatttccatttttaaaaaaggagtaaaagacaataatagcta  
tatattgtaattaataaaaagagcagaaagtccttatttagctaatactttaaatatttctggttttctttccaaatgataataataataa  
taataataatttaacaaataataatagtaataaaatttaaaaataattttgtgaagtttaacaaataactccaaaatttcgatactac  
caaagcagagcagcaaggatcttctgaaaaccaacatgaaaagcgctctataaaagcaaaccactctctacgcccttctgtat

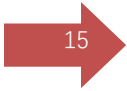

---

cattttttactcatttgctctctcggttctccgccacttcctctcagatccattttcttagatcccatca

**Vascular****>Solyc06g075220.1**

tgagatcatgaattctagggtttctgttaaagatttgagtgtttttctctgtttcatttgcggtgcaattatcaattaaattatgtaacat  
 gaacagataactacatatcatcacacctaacaacatacaatttttttgatccctttacttttgggactgtaaattagtaataactgat  
 agtatgtacattgacaaatgaagctcaactttgttttgcaaaacgaacgatgaggaagttggaagaccggtatcagattttt  
 ggggtcactggagatgggtccacaggttaactcttattcaacattataatgggcacaacaagatcttttgaaaaattggttactgat  
 tgttgatttaattcctgtaggttattggatacatagaagaagataatcgcaagaagtttagatttaacgaggacattacactcgaga  
 agattaaggtagattgtcacaatggttgtagatgcacagaattttggctgggaatttctctaaactaactgtttattgtctttatt  
 cccccaggcttttaagaggactttctgaagacaagctcaagcctttctataaatcagatccgattcctgagacagtaagctgca  
 gtttcttctagccttaacttaactcatcacatcggtgtgttgattcaatttcattctgtaattatcacagaatgatgctgatgtgaaaatt  
 gtggtcggaacaattttgatgaaatcattctcaatgaatcaaaagacgtgtttcttgaggatgttcaagaaatgaattttctcca  
 ttggttttgtaatcaactgagggatcaaagtttggtatgtaactttatcattctttttgttagatctatgcacctgggttaggcagt  
 gccaaagctctggagccaatgatcaataaactagcacaccacttacacggcgttgagtctctgttagccaaaatggaaggaa  
 caagtaacgagaccctcgtgctaaggtagttataataaatcgacgtttggattgaaggagacaatatttagtagcttgatca  
 tcaccttctctttttatgatcctttgcagtttataggattcccagagtctccaattcttccagcaggaaataagagcattgatccagta  
 agtgatgattatttgtttgtttgtgtacgtgaaccaagtaagatgccaaatgtctaattgattctacaaatctccaattcatttgag  
 actgaggcatagttattttgattgtctacagatcctgggtgatactgaacctactctagtgtcattgtataagtttatcaagaaa  
 aatgcagctatcccttcaagattgagagaccagcttcttaagtaggcgtcaagaggagaatggaaacgcaagagatga  
 attatgagaagagatttaactctatacccgacagtaaatagtagtagttttccatctacacttgattgcttttctgtggaattatta  
 cataactatgttttaggatagttgattgtaagaatattactagcacctttatagataaaaaataactttttttccagtttaggtctcaa  
 aagctgcattccattcaagtttaaggaaactcgaataatagagatatggtgcagcgtgctaaaacgccaaagctaattagattgca  
 acctcagattaacctgactttctagctgttcaaaaaagaatactgatgacaatacattaaaagtttctagatcatcattgcaataatc  
 ttcatggataactctagctttcttttttttttggaaatcaactaagcatcgtttcttttgatgcttcacgagacagccaagctcgc  
 aattgtagagttttcatgccctgtttcaagattttgtgctaaattactgtacataatagctcaagttgtctaactcctgttattctcaa  
 gattttgattcattgtttacaatcaaaaactttaaggcaagtttgctagcagctctgtttggtgcacctattcctgaagggaag  
 ggtcaaatttcccttcaagggggtgaaaagaatcgattgtaccttcgttatactttctttaaaaaaaatgtgaggacatta  
 cttaaatggttcaaatataccatcatctataaggtgtccacggtggacatcgaatccaatgagttggacgtcacgtggcatgac  
 aattgacacctcaatgcccaacttgaaaaaagaacgatttcagtttctctgtatattaattgaatgtaatttaatacacacaaaa  
 gtgtgcctaattagaggttgatgaattataagtaaccaatagaagaggatgggcacacatgaatcatgatcaataactttattttt  
 taaaattattttatcatgatcaagaactacactgaatttaacaaaactccttttaagttgtggaagccaatcatagccataatt  
 aaaatttctaagtagtataagcaaagcaatcataaaactttaattttgtgaaaactccaaacttcagatctctccaaatttctgt  
 atttccaagcaaaatgttagctgtaatagttcctccacaccgctgttttctaattatggtcaataacagtaactcacagattctaatta  
 gtacaattttgtcatttatacgataatgataagtaatttctatgataaatagtgattgtaacctgataaaatggtaactaacatgta  
 gaagttcggatgaatgaaattatcttacattatcgatgtataaataaaacattaaagttcgacaaacaaaataaaatttaacctccc  
 accaaattgagagattctacactactgtcaattggtttatacagttacatgatttccaacttctaccaaccatacaaaatttgtattt  
 ctctccataaaaccctcaatttctcaagcaccaatcatcttcaaaagttcaatttctcatagcaaat

**>Solyc04g026020.2**

aaaattaatgatcgggtattaatttaattttgcatgtattttgggaggacactataaaaaattgcatttctgtcatgtataatttcg  
 acatccaataaatcagaactctaacttttggttagaagacaatttttatgattgaaatggagaaatacagaagactaaagatgt  
 ggaaggacaatgtttaacgtccttaaatagagtttgaggagtttcaaaatgaaaaataaaaaatacataatgcaataattttt  
 tgtttttatgatatatcaaatataataattgtatgacagacagtgcaaaaattcataaagagatacaatttaatacaaaacgtgaaa  
 aatattcttctgtaaattagaatttttactccactacaaaataagaaaaacttcactttaaaaaatgtaaaagtaattatgta  
 tatataaaaatacacattatgagactaaaaacaacgtttgaaatgttacataaaactaaaaaaatttctccactaaactatttta  
 atcacttactaaaatagtaactattttgttcattttatgtttcgtgtgtattttaattccaaactctatctcatgttattaatgtaagg

gtcctgagaagtcgtacaagtgctcaaacgtgcatgttgccctcctctttatgaattataactctttatataaactacagtttaa  
atgtgtttacataatttataataaacatgtaagagcataaaagaaacttttgatcttgtagtctaaattaaagttaagttaaatgtata  
aaattgctctttgtgactttaaacgtgctattggaaagctgaaactaaaaattaccaaaaaattattctttttaacaaactaaaa  
aaaatgaatataattcttttgaaacacagaaagtaattgaagtaattgaaataaggtgctcctatgaagcaaacatcttgtc  
ctttcatagtaaaaagtaattagacaaagcactaattctctcattgttataattaagatttgggatctcatttcacgtgatgcatgtt  
tgtatgcttgagtttaagttttgaatcaagatttttttccatttttctggttacttcaaagggatgaccaatttgaagcttaagaat  
attgcatagtttaataaccatttcaaaaagcaagctggaaattgtgcttgataatagaaaaggtaactgaatatataaaaaaaa  
aacataggacaaaatgtttagtagaagctgaggtaaaatcttacattgagaatgacttcgctcatacaccaatcatgcagtgtctt  
aatattgacttttagtataatgcaaagattctattgttctactctttctgttatttcttctcttttcttttggaggatttaattgttg  
tttcatcttaattcttagtaattactgtgcaaagatcttttaagaaataatctctctcctccgaggttagaaataagatttgcgtac  
aatacattctaccctcctcaggctccactacgtcaaaagaaatatttagtaacatagattttcttttattaccacaaaaacatttagcg  
ggttacatgttgagtcgcacgtatttaataaaagtattcattataaatgtacgtattttattactattgtccctaaatataatagcaa  
caattatattattgtcacaatcaagttattgttaattgtgcagcaactagaaaaagaaattaaaaatgctccactggatgttttgagat  
aaagtgaatttttctttagaagcatagatgtgagactcttattgtgaaatggataaaagaaaatacctaaatagattttgcatg  
aattaacaataagagtcctgaataaattctgtggtccgatcctcctcaacctcacacgcaatgaaaggttagtgcaccagactg  
ttgtcctttaatcaaccataaaggaaggtgattatataatataatataatataatataatctctcattattgtaataag  
gatactaatcctgttttatgtttattttaataaatttaacttatctaaagtttcaaagttgaataaaaaaatgaaccataggga  
aataaacaagtatagatagctactaaatgtaagttagtttaagttataacctgaaattgagcagacaatagtataagcttactaa  
ctaacactctttaactctcaacatagatgtttcaacatctcattgagataatttcatcatacaaaaacatgcattggtactacattacat  
ttgttttagagtaaatgtcttaaagttgtagatctcactaagactatgatttcaaagttaatcaatcttcactcctgttctgttctgct  
gcctctgttacatccattacattgatagacaacaaacttgagcaaacacagtttcttcagctggaaggatctcattgtgatagcact  
gcacatctaaaaatcctaacttgccgacatattcagccagttccggaacaagattgaagcatgatcttgacttctctccctttcc  
gattagatccaatcattggaagtttcacaagcatccatcaatctcaacagttcctggctgttctactctagaaatgaattctttatgc  
tctccttaagatttagggtttctcatttcacgtaaagatgagaacaaaatgacaaggagaattaatcctatgtctaaattactttt  
actgtgaaaggacaaagatgtttgctcataggagccattcacatgaccttttcataactttacagcaaattagaagcaaaagac  
ttgattcaccaccaccttagaccattctaattacatataaaaccttctcaatagctttacaacacacaacaatattaactacact  
gcctctccaaaatctctttatttttttctcctcgaa

>Solyc05g006830.2

ttaaacggacatgtttgccgggagcaaatggctccattactaaggtattaacagacgtctatgaaaaatttggcaaaaaaca  
aatccaaaatttaggatcaccaaaaatctatgaattatagcatgaaaatcagcaaaatggtgtttacctgcctgagactcgttt  
gatcttgaaaattggtcagtttgccgtagcgaccaattggctccatttctacggtaatgattttgattctttgaaagatataagcaa  
atgtgaatcattttacaatatcactccatttaacctatgtagagctcgtttgattagttgatggtaaattagttgataagcttgaagt  
atgaaatcgactttaagtggttgaactagttttataataaacagttatgtatttagatggacgtgttaaaattggtaaccgtttg  
attattggtaaccacttttgattctttgaaagattaacaaacaaatggaaatattatgatattgtactaatcatttgcgctgtttact  
agggtgttattgacttcacagctacatggtttggctcttgcaaaaacatggatccaaatatcaatgacttgcgccaatatacaga  
tgttgaatttgcaagattgatgttgataaattagttgaagacttctgaacttcacaatcctttcttttctgagtttaagttctataaa  
ttgacgtatttacacaattaagtccacttataagataattatacaaaacctctataataaacgatacaatttggtaaaagtaataga  
agttataacgtcaatgtgtatatcttaaatccttttctataatactagttttactcgaaccttgacgattggaacaggatgtagct  
ctggaatatgaggtcaagctatgtcaacgttcgtgttgatgaaggaaagagaaggtcattgacaagattgtgggagaagata  
aagatggactaaagatgaaaatgagaacacaaaggtagcttataactaagcaaaccaagggaatacaagggaatgacac  
ttcctttgttgaataaattttcatgtttgcggaattttcaagtggatgagatcagtcgagtggtctccgtaataatttttaactgat  
acaactagctgtatattcatctcaagttctgttacattttgtataagaaaatgtctctgtttttatgttcatatgtctttccataaa  
aagtatatgatacaataaattgtcaagtaaaatcatgtagtttagagcaactttgaagtttgacatacacataaaagtttgaagat  
gtcaaacagaactaaaaggaaaatagtacttttctggggataggttgaagaattttcctcaactttctgctttttatcaatacatg

ctttaagtattttaacaatattctttgttttgaattgaaagtaatttgaacttttctctcaaataaaagatatttaggttgtgtatt  
 gtttaattgttttctagctttatatgaggagcactaacttgaaatgatccaaacaacatgtattgttactttataatagagtgaat  
 ttatagctttaaacaagattggtaaagagttgaatgaatcttaagatttcttaaaagacattttgtttgatgacccaaactattggct  
 catatatgcatactgtgaatagccaaatgacaaaaaaaaggtaatgcttttaagtttgatttagtatatcattaggtatct  
 ataggataacacatttagaataaccaatataagtacaaagtgtaaaccgcttcaaagagaattcgataagactaattatctacac  
 acttatgaatcgaatagtggtcatagatgaaatgtacaaaatagtgagaactaatatggttaaagagtttaattgtgtgactaatgtt  
 gtcaagatatacacaaaactccacagctcaaatatatcagatttatcaactgaccggataaatctaatatgtttcactacgaaa  
 agttcaaagaaaaacttactgttcaaatgcaattaatctttacatacaaaaacaaaaattgttattcatgttttcatcatatagtc  
 tctccaatatagtcattctccattcacgtgggggattattgagttttaaagggtgtaaagggaatgaaatattcttccaaaaga  
 caccaacagacgtgatgaatttgaataacacatttccacattgaatgagttgtgacttttacgatgagttgtgacttttctgataaga  
 cacaatagcatctgttcatactactcttgttggtataaaaagaagaattttcttattttctacatcaatttttttaacttcttgc  
 tttttctacaagcaaaatattaaatcggtgttgcttcttacttattttgagttggacgaagttattgacgtttgaggtatcggtaca  
 ccaataataggtatattgactttgtctagggaggaagcaatccataacctagagtatggactaaacaaggaaataaagaaggaa  
 caagtgcaccatctaccctttattttaaccctcaagttatttcaagatagtaggaatcaatactagaacaaaacattgttccatca  
 atagcagtaataattgacttctaaatatgctaacaagaataataataaactactttgttcaggggtgaaaaatacagagtgaga  
 ataaagtggtaaagatcctgcattagtaatactgaaaaaagaaccaacacaaaacaaagacacatagcatcaaatcttctaata  
 atgatggaatgatcaacacaactcataatgaacatatctgtgttaaaattttaagtttctgtacatcagcaaccaatataaaaagg  
 ggtccctggaagactctaagctccaacaataatccaacgataaatcttctgaaaaccagaagagcaagttcgaagaaa

### >Solyc01g111310.2

gatgtatataaaatttatattgcattggattcagtaaagcactccaactaaggggagccatcatggtaaaagggttattcga  
 attctgttcgacgaaaaattatattttatatatgattaaaataatattttatgtgtatatagtaaatatcgaaccacttcaattagat  
 gtgtatctatttctataaattttaatcccttatttaaaatttatcgctgttactacttcaactatagattttcaaattcaaaactaaaatc  
 gtacatttaatacaagaaaggagcaatccatcctctgtttgggtgtggtcgttcttattactactactatttctcgttcttcatat  
 gaactttgtgaactacatggacatgagttggtgtaattcgattataatgaattacgacatattatctactttgtccttaggtgtgtac  
 ttataatgtcatgtgacattattctaaataatctcattatttgaagaagaataaaaaatacaaaaaaggaaacgaagaaagata  
 aaatgatactcctttatcttgaaataattgtcacatttagattttaaaggatctaacttaattagacttttgggtgtaaattagatgaaat  
 aatttaagttagatatttttttacatgaaatattataaattatatttctctccgaattatgtattgtcaaaattcaagttatttgact  
 tctgacaaaaaaaaccagaaaaattgaaaaaggtaataactcttattagtcttaggtcttattgtttgtatttgatggacgtctaaa  
 ttttaatcattcagatttagctcattaaatattttaaatttttagatctaaatctaaatcattcatattcaactcattaagttattgtttttt  
 ttaaaaaagcctcttaattgggtctgaagaggtctgtatgactcttccaatattcaaaactcacgtgataatttatcaatcaataaatc  
 ataacttttttttagcgtgtctttttatctcataactaattttttcttttatcaattaacaccattttttccaataggttaagtttcata  
 aatcttatcaagtattttttatattaataatttctgtattgacctgagtcagaacaatggttgcaataatatttttggtatattgttatt  
 tatcaaggttttgaatgaaaaaacagtactcaaatcatgattattagaatttttaatttttttaataaaaagtaatatatttgtt  
 gaaatgaaaattttataatatttattagatataatattcaatttcgcttcacgttttagatattgaaaacaaacaacattaattacttaagt  
 tcaggtttataaatcacatcttaattatttagatatttattcagatcaaaacacttgaatcttaattcagatgtatattcaaaattcaaacc  
 tcttaattttaataaaaaataatgaggccttaatgacattgatgttgacgtcattatcacataagataaagacagaattagaataaa  
 gtacaatgtgatttaaggcaaatcttctattgtaggcacataaaatacaattaatacgaagcatagggttaagttaaattaatca  
 aatgttatgcatatttctcaatgggaagaagagaaaccactcgtgcaaagaagccagtcacgtcccataattacattagcatct  
 gcactaaaagacaataattttaactaataaataatttgctaaattaaaagatttaatcataggaacaattgcttgggcacg  
 attaccatggctattcgtcaaagctcgaaacttgaactgtttcaacttgggaagctataaaccaacattttatacactcccaaaat  
 cacaccctttgtaacttcaaagaggttaataactaaattttaacatttcttccgtccacttataattgaaataatttcttttttaaa  
 atcaaattatagaagtttctattaatattttaagatatatctttatcatattatagattaaaaaattacaatttataatatttgtataatt  
 tctaataatctaaatttatatttaacatatataaatttaataatctaatttaactttaaaaaattagtcaaattaactttcaaaaaatcta  
 cataataaaaaatgaacagatatataataaaaaaattataagcaagtgcttttaagttaaataacacataaacatctaagttgtt

>Solyc09g010080.2

gatttcttgtgttttggatgaaagaatgcttaggtagggggcgggattcagaatctgaatatatcattatagatttaaattcgagattctt  
ccattcatttcgtttatagggtttacgtttgaggtatacatactatttgtatttatttagtaaattctttaaaggcttaagtcatacatacta  
tttcttcccttctttcaccacccatcaccgacatcacaaaatatttaaataattgttggtgaagaatagaattaaaaataattttgagg  
aaactccattttttcgacgaatctgaattatttttttaaatcggttaagaaatttaaactcctaaaaaactcacacacagaagaaaa  
aaagtatcaataaaatttaaattaattttaagaaagtagtgatattggggagaaataccaattacaataatgagtaagattcaagga  
gaaagataggtggatggatgaaaaacaaattcatataattttgaattgaaaggaaaaagagtc aaattcaaaattactatcgaa  
atacttcgattttgtgtctcgctgaagggaatggtgaacgaatgtcagaagagggatgggggtgggatgttctgggaagaag  
aagaagaaaaggggaacgaaatatttttttaatttttttagtgaaaacataattttgtttatttttttaatttatgttttaag  
tgtgtttatggggccaatgccacatgtctcttttttagtctattttcacgttagcagcgagtgtaggacattctctttacttttaa  
ttaattgtcaaaatatatatatctctttaaaatacactattaaataatacatcgataaaatatcttttccaaaatttgattattattacaa  
taatttcgatcaaaattcatgaggtgtttttcttttttatatacaattcactaataatttggcaatggaatccactaagaaaatcaaagg  
tgaaaaaactattaactgcaaatgttgcaagacataatttatgcaaatgaaaagtagaaaagctaatacttttgccaaattcatcaaa  
aaaatgtaatgtgtaaaatgcactttattgtgttatgcatatatgttcacacattcatctatccattatatttcattttcaataattact  
gtggtctattcatttttttttggaaactcaaatatcatgattacataatttttaaaattcgcgttacgatgaaatataaggcgaaaaaaa  
ctattaatctttctcatgaggtgaggtgagggcgagaaaaacaaaacggtatatatttttgatgtcttgtgtgaggtgtcactattct  
agttgtgttttatctccgtctatactgaagtttaaagtagatatagctaatcgaaaacataatttttatcattgaaaattacaaatttt  
tatgtacgtctttgttgaaacgtcgataaaaaatataaatattaatcggaagtcgggtcaaaaatatttctgacaaaaaattctattcca  
tcgataattttactcttttttttttaagtattgatcaatttattcatctagaaggataaagctacattttattgttttaaacatatattta  
cacaaatgggtcttttcaactatatgttatagaatttgtgaattaaatcaaatattttttgttatgatttttaggttcgagtcgcttataaa  
aagattgtagttcatagccaaaattcttctcaaaggcggaataataattttaaatttatgagcgtttgaattctaaaacagataattt  
atttaataaattatattatacatatgagagataatttattcaataaattattttattatataagtgaactttaataataatatacg  
aaacgcttatgctaaaattgataactgtatttttttaatttttaattgttttggaggggagaaggtaggtaaaattgaacatatattg  
gtacgtgacaattctaaaatgtcttgaaaggctgctgctggtctacgatttttaacgagagaggttaaaattaaagaagtaaaat  
agataatttaattatgtataaataataatattttctatcagagtggtaccgaacgaatattttttgaatattttttgaattaaggcaa  
aacaacactgtatatatgattaattttcgtcaaccaatagtccttctctagttttctatacgtcaaattagattgttttaacacaaata  
cttatatgataatctttacgtgtaatcgatacatagaaaataacggtattattttttaccaagagtcttatataactttatttgaatta  
ttacgtcaggctttatacgtttaaatttttgtcatgtaaaataactttacttttagtaatatgaaaagtcctatacaagcatcgagtgata  
atttgacttttattcgattaaaaaaatacaccttatatacaaaattaagattatattttatattgtatagtaaatttgacctatttattga  
cgatataaaatcacccctgatcgctcatgcttgaatgaagacacctgattgatttgatttttcacatgaccttctctcgctcttctctt  
tacgagtttgaattttcatatagttttaattatcatgataaaaatgagtgaaatatatttttaaaattatatttgatacatatatcgagat  
aaaaattaaaactaaatctcataaaaatgaaaattttgatttcgctactaaacgaaagaaagagaagtcacgcgtaagaaaaata  
cggctaataataattgaagtttatcttttaagaaacattatttacatccattttatttttaattaaagaaaaagaaaatataaaaaatcaaac  
cgtttttttatccactcatcatagttggttttgtctataaataatccaatattcttcttcttcttcattattcttcaatatcttctccaaaa  
tcacaaaaaa

**Inner epidermis****>Soly09g062970.1**

cctccatttctatttaatgattcgttaaatacacatagcaaaggtaacccgcaccaggcgacgagctcgatccatgaaccccttgctt  
 cgctagcaaggagtttcaaacttgagactgccaaactggaatcccaaactcaaactcattgggccaccccgccgaaggatc  
 ctctctcctgaatttctcgtcgtcactctcattttctatttcgctatctctccctcgctctctctctctctttatacaaaacaatgtata  
 aaatgtgtttgtatttagataaagcgaagaaaaactatatatacatatctgatcgttttctctctcccaaagaatctcgtcgtcc  
 actctcctaggtctcgtcgtccactctcactttatacatacataaatgtataaattacgtttggttgataacgctgggagaaattgt  
 atatacaaatatacaaatgcaaattgcaaattcaaaaacatatattttatccaatgcacttataattatacaaaactgatcttcc  
 ctgcccgttatctttgtctttctctttctgtttacactaacacaaatgatataattgattctttgaatacgcataccgaaatatatta  
 tacaattgtttctttgtatatgcatattgaaatatacatagtgtatgtctttgcaaactaaagttattataaaacacaattatacgac  
 ctatagctacaaaaatacaaatatgattttatgtttgctaaacctaaaccaattttgtgattaataattgattttaccattattgtttaat  
 atttgtttattttattggaaattgaaaaattggaaagggtggaggtggagaacatctttaagaaatttgataaaaaaaaaaacaga  
 aaattagaaggaaaaaaaacaagtggtgtgagatgacgcgtgattcccacgtcaaataatttgaaatacatcaatcattcaa  
 gaaatgacttaataatacaattttttataaatttttaattttctgccttttgaaaaaaaccttaaaaaattcttatattttttattct  
 tgttatatcacttaattgtgatgtattagtcggagcaatatgttgagacactatgaatcaggataatttgaaatgtatctgaattttatc  
 gaatttaaagaattattgtaattttgtaaagaaataagaatatcaagtaattaactcctaactataaaatttactaacttttataatta  
 ttcctttatccaagtattatgtttgacatatctcactgtaaaaataaaaaatgaattatgtaagtaggtccagagaggatcgatag  
 gccggttgccagtaataactactctaagtaattgacttgaccatctatttaatacaatactttctttgacctatacacctttctgaa  
 acatgactaaaaacaaacttcaaaatttaataatcaaaagaaagaaacaaatagaccctccccaccctaaaaataagtattgtttc  
 aaatactttttattataaaaaaatatgctatgaagctagtgaactttaagagaaagagtaattctagataaaactcttaattat  
 aattaaaacgatcgtttgatttagcttctctgagattacttatcgattcactatgtatatagaattacttatgttatcactataatataat  
 taactcgtgggataagttttccaaatatgataataaagatatataaaaaattacccactactattttctgatgggaaaattacgct  
 gtttaagcaacttatactacttaattactcatttttagttatagtttgctataattatcattcacgactaacattatactttaattatgtgggt  
 tgactttgagtttgataaataaccacgtttgtatatgtataattcatcagaatataatgaatatacaattatctaactgatatacatcta  
 caattatctaactggtgtacatatacgaatcacctctctccactctttgccttctaattttgttcattctctctcctataacatgtatc  
 aacgaattgtaactatgaaagagaataattagactatttttagtgactatatatgaaagttcctcaataaaatagtaggcattgtat  
 aaaaatattttacaaaaatataccaccacaattgtggtgaaaaaaagtaaaaatattttgaggagtaattgtgtctttaaccattt  
 taatgcatgcattaaatcctttgcattactaatacctgaaatcaatggtattagtaatacatttttaatacaatagagtgtatattaatt  
 atacataacaagaaaaagtataccaaacaatgaacaaactaatacaaaagctaatacgtatattttttgctaataaactctacca  
 aacaacccctcgagattaaggatgtccaaaagtttaaagacaaacaatatagataaagagagcgtttattacggaagaaaaat  
 ttgaaaaacatttttagttaattgaaaatctcaaaaatgtctttccataagtgcaacttctttactatcccccaatttatctaa  
 gataataatattctcttttacctattaaaactcaaaataagttagaaaatagttttttatataaaaaataaaaaattgagaaaaaca  
 tttgtgtggaaatattttttcattgtgaaacaaagtaaagggttttccaaactccagtaaatagtagtacaagcaagatgcatac  
 agatagaggcattgaattccattaaatgtgtgtattcattctccaccaacccatttttgctataaaaagagactcatggaacac  
 cacttcatcactactcatcaagtgtagaggcataggattaaaaaaaatataggaagtgtggcaacaagttgtgcatagttgtt  
 cttgtcttgctttgtagtagttcataccacagccgaagagac

**>Soly09g062960.2**

aaagttggagttcgggggggggggggggggagagaacgggtgtgtgtataaatatttctacaaaatgggctgggggtggagttg  
 gggatattttctgcaaatggactagggtgcttgagaagaagggttggggggtgggagtgggcgtgagaattttattggcttaat  
 ttttctaaaagttattgcaaaaattcacatgtcattaattcattggttatttttaattttacccaaaattattgtctaagaattgttttg  
 acacaaatgaaaaacatcatcgtttaattgtcactttatacatcattcgcgagtgaatacacacctcttatatatattgttgattag  
 gaaaaagtgtgaaatgacacaacgatatcgatagatgtctaaaataaacatcgacacaattgaggtgtctaactgaaattt  
 cgtgccaaagtttaagaggccaccgatgggttaagataaaattttaaaaatagaattatttttaataaaaaaatgaaacacttatact  
 ctctagtgatgggtgctgataacagtaattattgtagtatagtaaattagtaattgatgggtgacagttgtaacgggtgaaggtgg

tcggtattgtgataactatcataatggtgatgaatggtaatagtgttgatagttataatgatgaaattgattgatgtagtagttaac  
 agtgtaatggtgataaccaagaaagtgtaatggttggtactgtatttgtgatagttggtgggtgttctacttatgatgacggaa  
 gtcgatggttagtagagattggtcatggtggtgaagtgggtgatagttgtggtggatgtggacttgacagtactcttgatgataac  
 tgaagagtgtatgacgtgatagttggtagcagtgctaattgtgatgacataatttattagtagtgggaattgactatagtggaat  
 agtgggtggtggtagggagatggggtagtggtgaaaatggatatataatcataattatagaggaggaagtgtggtagca  
 gctgatagtaatagttagcaatggtagtggttagtagtagcatagataatagctagtggttgacaatggtggtgattgtgatgg  
 cagagggtggttagtgatgatggttgataattgtggatagaataatggtgaatattatccacacaaaaatacttattaatgatattaa  
 acttttttctaagcttaatgattaagtacatctataataaaactaaagcaaattaatttgtcgaaatatgtttatagaattgaactct  
 ttatttcatatttgttttctactgattgaatgaaacttatgcaatcgatcatgatgaaaattaaatacttctcttttaaaaaaatact  
 gttgcttagccttttagtagattccgaagagctcatgttctcaccgtggacctcggtcctcaatgtcatctctaaatccagagtttct  
 actcttttactacttcccaccccttgagctcctaatacaggttaccgaaatcctttaatcattataatcaaaccctatttcaagca  
 aaatattcttctcattggcagataaaggggccaatacacccaaacatcctatgccaatcttgcaaggaataaaaaatttcaaata  
 tccaaagttgtcatcaccaatatctcacaacacaatttcatattctaataagaaaaatgaatttctagcccaaaacttgcgagtga  
 ccataattggtatgaaatcggaatggagaagtgttgaaattctcctcctattttaaagtgaactgtggagatcaaggtgta  
 actctagatatgaggaataaaaaaccccatcattacatctatgtctctcatattttcaacatatgtcaattgtcgaagaattttctta  
 caaatctgaatatatttactgaaaactcatgagaaaatttgaagctcatgaaacttaacatagctgatactagcttgtacctgt  
 gaggtcattgaaaccctgctcttatttgaattgtgaaaatgaactatgatggttcatatgttgaaaatcaagaggtggtggaata  
 atgaacattccaacctagcactattccaagacaaattagaggccttctgaacattgaaaaatgataatttctcctcagagttgaa  
 aaagaaaagttagtatgattttttatacctcctaattagatgcttctgttgtgctcatatattatgcaaactcattcagaaggcaa  
 ggtaaagtctcctcctcttttgaattcacattaatggcaatgtttttgttttttcttaaaaaattcattttaaagtctccattgtaat  
 cacacactagtcttcttaataccctcaatttagcgtatatatatattagctttcatgtactaaactttccataaattgtcacttcatgt  
 tactctccttgccttaaatatcctcttactatcccttgatgtagtatgcatatcatgactacattggatctatagctatcctttttcatg  
 cagagatttcaaaattgtttatggattgtagatctaataccaatttgttatgttcaggaagacctccggtcaccagctatttttgact  
 acataatttttcatgttattatgttgtgttggtagctcgccaaaccacatcttttacaccttctgggcacctagatactacta  
 ctacatcaaccatatcaaagtaacaaaagaaagtaaaagggtcacgagacttaaaaagaaattaagaagtgaataacactta  
 ctttcatgaaatgggaaaaatcacgtaacattacaatatgaataaatccaaacatcaacaacaaaaaaagaaaaacaaa  
 atcactcttttctcactagtagctagcaaaactcgacatgcatgaaacaaactgaactaataagataagactaaaactttagat  
 acatg

#### >Solyc04g082170.2

ttttagaaggacatgtgctaaggagtcattttctgttggtactaaatgaaatgatttgtctgtgacatgtgataaggagtcatttct  
 tgttggtacaaaatgaaatgatttgtctgctgagttttagtggttcatgtaccattaaatggtaggtcaaattactgttttacttctt  
 gagtgctcaatttgttgcctttgtcttgccaattgtcattcaccttgcatagcattcccgccctaaagagatttggaaattgaa  
 tttataagtagtgataataagctccccctcctacgagacttatagctaatggaagaccgagcatataatgtgtgggtttaa  
 gcgcacataacatgtttgacaatagcctggaattaagcggagaagggttagaggatgaccttctcattgtgttcaaacagta  
 cactaatggccttgggatttctcagggttgggtcagtgagtttaatttcttctgctgccttgtttatcttttctaacagtgtcgaaa  
 gaaattgagagctggttactgcccttgaatgattttccctaatactgaactatgttgaattagtgctatggtggttgtcagt  
 ttggtgcaatgttattgttgatctcataactgaagaaaaagtcagatttgtgaatgttcttgggaattgttttaaccttccagtagtga  
 actttctgttcttactgcttttccaacttttggctcctggacttgacattcttatttctatttgggtggatctgcaaattagaaacgaacta  
 agcaatctgtagctcatggaattaatgctgatggttcaagtagcagcaatccaaatgaactacctcaaagagatgagcgtcaatt  
 ttgagctctcttgacgcttgcagccaggggaaatgagcctgctatgccttcaatgacacacttagataggggagttatggg  
 gactattggctcggaacccgaaatgttgatggccagtcagagatagcagatgcaatgtctagtgtcctcagagtcctgcttta  
 aatggttgttgagtggggtttcacaacaaactggggtggtctccggtatctttaggaatatgatgcagcaattcactcaaa  
 gtccagcaatgatgaacactgaagtgcagattggcagcagattgacacccaggatcttgaagcatgtttccgggcaagggtg  
 gtggtatggacttgttaggatgtttcagcaaatgatgccaattgtgtctcaagcttctggtggcatctcaggtgtgcctcaacga

attcctaattgacagaggcttggtgagaatactgcagtaagaggggcaacaccaaccactgaaaacgttcaggtttgttctt  
gttagctattttttgtagaatgatgtatttacaataaagttttatgtatcaattgcaatctttcagattgatctcatgaggttgc  
ccaagaaatcgagaacaatagtcacacctgtagagattcttctgttctttggttcaaagtagagaatctttgcatcaccatggaagta  
gcatgtaagtctggtgatgaactatccagtgagagaacctagccgacgtgagtagctggatttggatttgatttgggtgttt  
gttaagggatgcatgggtcttatgtttcattctcattcctgcaggaattcatgcagatgctgcgtaatgatgtttctcagcgattcaa  
ggataaagaggggcaaataagggaatatacttaattttcttctcattttctgatattttctaaagaatgtcatcattttgggttctcaat  
tagacagacagagacagctgatgtgggggaaaccattattatactattcccgtgtgtatgtacatacctatggaatagttaat  
ccagtggatgggaactgtattttctatgtttaatcaaaacaatgggtaccattttattctatcaatgtgggttctataacaacaaaatc  
acagtaatcctcaagtggaaaccttactcctacggtagagatgtgggtattgtttgatgcatgattgggtctctcctcatcactaaa  
caattcaagtgggtatctgtagtaccattgggtggtataacaacatatttaatttagtgaattcctcttgaacctcaatctcactccg  
ccaatacctgaaactgatataaactgtattcaatatctggcctcttaatttttaacttgatgataattgataggtttgtgtggcgttg  
attaaatggatcattgacgtaaccctattcaaaagtaggttcaaataagattgtaattgcaaaattgcttagtagatgtaat  
taatgccaatgaataacaataactcaattgacaataataaaaaaattgttccctatcggtacaaaactttaaaaaattgctgattttg  
atcaagtagacaaaatattcgattgggtgcctgcagtgaggtagtgggacatttaaaattgctctaacgcataagttttgttcagaa  
ctcatagtaattataatttgggttttttttggataaatttgttctaaacttatgtctcgcaattgcaattttgtattgggaaattag  
gctaatgatagtcagtgacataattacaaaataaacagaagtagatataacagggtgtttgaagtgcctagttacatgacttgct  
aattacatgagttgggtctaaataattaattttttctaaaaattacaaaatacacattattaaataggacaaaaatgtatcttgag  
caaaactgatcatgtcagttaagtaggtaaaagcttttgaaagacaaagttagctacgcattccaagtttagatgagtagtttagca  
gctataaaaaacaagaagtgaagatgaacaaatcataaaacaagtgacatcgacttaaaaagctttttttttttcatcattttgg  
aa

>Solyc04g072310.2

gagaaacatagattaagattagaaaagagaatttaacgttattagagaaaaaattacacacaataatattctatattttacttga  
gaaatgacgcaaaaaactaataatattgttcatctttttcatatcatcacattaaaaagacctaataatgtaactatataataataa  
tcttaatatagtgacattttataactatgttaaaatacattgatattccatttttgaaacaatattataaaaccaagcatttcagtttg  
ctaaattgtcatttccatataattccatataatggcacctagctatgtgaaagaatatgacattatctcatctttgagagtcattctagc  
taagtttgaccacttaaggactatgatataatactttattgtatcggtacgatataatttgaaacatatacaaaaaatataatcac  
tttcttaatttacatgaaatatttttagtttattataatgacaataaggagttattactaatgtggttaataatattttattgttaa  
aaaaacatagaactcctaatttatcaactcaaaataaattttgaacttaagaaatctatcggtcaaaatttattcacattcaac  
caaaatcataattttctaattgcaaaaatcaaaaatcaaaattttcatatcttatctgaacgatcataacatctttatcttctaatcccact  
tacgtttggacgtatgttataaacatttactttgtgtctcttttgggttaacatatagttgtgacttgaatattgggtgaaataaaaaga  
atcaactatgtcagattagatcatattgttattatattgtatgatttaaaactataaaatataattcatataataactaagattgaagt  
atgagtctgagaatatctgagttgtgaattaattaatttaatatattggaaaattaggtgtggtttgtactattccaagaaagtaa  
gacaaactccaagaattaaaattatgtctgtctgacatattttctttaaagcaggtagggcacctgccatgtaactcttttt  
atttaattctttccacttcaattttgtgcatttaataatataatgtacatatcatattttgtgaaattagtggtgatgacattattgac  
cctaagcaaaaatagcaatatatacatgcatgatgttatgggtggaacgcttcgatagcgtcggaggcgaagtcagaatttttcg  
aatataaatatatcaaaagtaaaatgtattgatgtgcgaattgatcttcatcctcaagggtcaaaaagcttaatttaaccatgtgaat  
aatttagacttttcgtattacaaaatatatacagagagagacatatgcaatgtctaattttacgaagagatataggtgcagggtccc  
tatttttggctctaaattgtagctgggtgtcaacatgtcgaggtgtctagctagatatcgttgttcgaaaaattacactacatataaat  
taaattttatttaattattaatataagaatattttgaatactgttaaaatcaatagagacatgtaatgcaatggtaaagacatgctcaa  
aatcaatgttactatcagaatttttgattcgacatgaaatttctaactacgtgtcactgatctaaattataattttatttaacctgacata  
catggtaaatgtttctaagaaggctttatctcatggatagatataaatggtaatgatacaattaggtcatatttcagataataaat  
actttataagtagataatattactgatttaaccattttgtactttccggtaaattatattactagtaaaaatcgtttttaagtaaaaca  
gggtgggttagtcaaaagggaatattaatttaattaggtgatattgggtgtgaaccaagacatgtggccactagtcactccctta  
gtactcagcatatgataatgtattaatccttggaataaaataactactttctccatttttaattttgagatttttaataaaaattaaacga

ttattctgaattatcaattattatagataatattttttatgtagttttaataaattttttcactaacatggattgtcgtgtaataaaga  
ttattctatctgaattaaaagatcggaattggagctttgtgtataaagaaatcttattgggagtgccatttcaaataagtcataatg  
tgcaattccaatttaattagttactctaatacggacaccaaacattgagtgattcaaatttaattagttagttactaatacgtacg  
agcattttatagagtgaataatcaaataaaataaaatatttttcaaaacaattcactatgtttaaactatatgaatctcgaa  
acccgaacatttacatatattgtatatgttagaagtatgattgctcatctaaacttaaagggttaagccgtagagagagatgcacat  
ttttattagtttaattctctcaacacggttctcacgtgcggtttaatttttttcataaaccaagcatatgaaattttgttgatataa  
atagcgggtgatctattttttcataaatcaaactcataaaaaaataaaactattcgattacagaatatatctgctcaatctgataca  
atattaaaatatataaccatcttatctaatagattaaactattcgagaaagcacactttacaaagtctatagaaggattactacaag  
catattgtatgtgtcaaatattgtgtgtttaacataaaaagggccaaagcttaggttcattaaagaacatcaccaaaccattcagc  
aaaaacattaaagagagcaagctactcatcttctatttattagttgcaataaataacaagtccaaaaatataataatcaagca  
tttgaagaaaagaaaggagttattaat

>Solyc06g065530.2

ttaaataaaaaatataataaaaaatattcctaattgtcaaaatagacaaataaaaaatataaaaaatataacaaataaa  
tagaacaagatatacttattaatatttgaggagatggccatagacacatttctaattttgttgcaataaattgttattgagccattg  
gttaacacagcccatttctaatttctttttcttagaaagagctgcaaatgtttttatatattggtcaattcgtagcacaata  
atttaattttctttctgtcaattgatattcatttccaatacagttgttttcgatcgtcgagcggttactattaataaaaaattcaatta  
aattatattaatacaaaacaattataataaaaaatatttctgatagtctataactcaaaggccttaataataataataaaaaat  
aaaaaaatattttactcgatttaattcgttggtcattctcaatacatattgtcctttgtagtagtttattcattcaagagattttctgtt  
tagatttgattgaacaaatattgaagggaaaaaaaacttttaagcagccctacttactatttttaatatatgcataatctaga  
aaaaaaatcaaaataaattccatctaacaacttctcaacaatatatccaccattcgagaataagtcaaaatatttttttagaaa  
caaaattatcgatgacgagaaaaatcaagaaaatatattccaagaaacctgaactcgttcccatattttataataaactatatattg  
gactagttcaaaaaaaattgttctaaaagaatttctgaagattaaaaaaatttgatatttaagaaaaaataatcaatccactttta  
ttaagggtattttttaattaaattatattttatatttgatatttccattagaataagctaaatcatgattcgaataatgaaaaattttat  
aaagtggtgaatcaactatcccaacaagatacatattcgattaatgaatgaacattgtttgactcaaaatagtcctttaatatat  
tgcaaggcatttttcgcacatcaaatttaacctaaaatattgacttcaaagagagaagagtaattgtttttctgaagcaactaatta  
agcaagactggctgttagctgttaatatcaatcttaaaataatttcacgatttcgtaattaatttaatttttcaaatataagtggttaa  
catgcatgggggcatcaaaaatttaacatttgctatcgttttagtactgttatagcaagtaataatttcgtggggctttgaatttatt  
aattttttctattgaagaaaatgaggggtatttttaggcaaaggtagactagttaacatgctccgtaataataatcaaccgaaaa  
ataaaaaatgtatatacattttaaatatcccaatttaattgccttctgataaaccttaataaaatatttgtaacatggattacagggaga  
ttgacgttgatatcatattgaagcctgacgaatgaaatggatgctcgcatthaagataatgcgttataagaacatgctgcaag  
cctaagataagtttcatagagtgatggttaactaatattattgtgtgtgaaacagagtggtgactataaaaaacgcacaca  
attaaaagataaaggtagtgaataatgagaatactttaattagatgaatgtgtaagtatactaggagattgtgacatacacia  
aaaattttataaggagtgctgaaaaattataaaaaataatgatttgcataatttttttttttaaaaaagaacaaaatgaat  
aaaatacaattcatgctcactataacttttctataaagaaatttttaacatatatatatatatatataataaaccatgaatc  
tttaattttgtataatcaaaatgactttttaaaattaataatattaaattttcaaaaattggccttcattaattttattggtgaaaaaagg  
tggaagcaaaaaaacatttttaaaaaatagtcataagaaggatgaatgaagaacttcaaactataataggaatgacaaactct  
agatttgaaatatatatatatatatataataatttttgaataaaatagtgctactaataaccttttaacttacgtaaatattctatat  
taaaaaagataataaaaaacaaaagtataaaagcaaaataaaagcaataactattaaataagatgaaaaaaatagatatataa  
attaaaatgattcatatcgtataaaaaacgagatgcgctaataaggaggtattcatcgagaaattagtggtattaagtgttgagcttc  
gtagaggccaagttggttaggaaaaattaaaggggtaataataaaacattagtgcttgacaagcttacatgtacctgggtcaattt  
tataaaatattatataactttttctatcaaaatttagatcagtattaaaaaaatataatctataaatatatcttttaatttaacttaaaatt  
atatttatgtcctttaactttggtgtgcacaaatagacactcaaatttgataaaattgaacaaataaaaaatgttctacatgtcatttt  
ttgtcatacgtgtgtcctgcatgaatgtgtcatgtaggactcgatgtttatttttaaaagttggatagttaaagtatctgtttgtt  
cattataaaaatcgaagggtcaaaattaaaattgaagcaaagtttagaatctaagtattataaaaaaaaataactaaacttttacctc

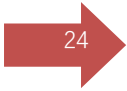

---

tcatttcttttttatctcatcttttcattaattctttgttgaccttcaatagcattaaataacttgtatataaagaggacatttctacatctac  
cctaacatatcccaactatactctaaccaaataaaa

## &gt;E8 promotor

catggcatttgcattattctgtgacaagtgttatgtgcattgagaaagaataaaaaattaaagaggatgtaccatttcgagggac  
 gtatcgagtgccgcaatggatactatattttgaggaatgtatcgacgctgctatggatactatatatggagggacgtattatgca  
 cgatgattactattatcgaggattgtatcaaacacacgatggatgcatggacatatatgtcccccattggatcccgacggaga  
 gacagcaggtgtgtatcaccagggtcaaactgtatcactatactattgttatttaaggggtgtcaaattggcaggttgagttaaaa  
 ttggaaatattaaaatgggttgaaatagaaatcggttggttcttgacccgcccaagtttacttcgggtcaaattggattgggtc  
 aaatgggtcaaaaaaaggggttggttcttgatcgcccaatttgacccgattaatttcaataatttaactattgatatttaactttat  
 aatcacaatttgaattttcgcctcaaaattttttgttaaaaaagtaacaaatggatagataaatcataaaagattataaataagataat  
 aattcatgcattcaatacaagaaaatatcttaataaaaagttttaaaccgggttgaaattggagattgtattaggctcaatttagaat  
 tcttttcaaattgggctaagctttaattgggttgagattgaacgtaattcaaattattctgagcccaaaccttaaaattctaggcgggtt  
 atctttgtttgaattcatttttgacatccctaattgatattgttcacgtaattaagttttgtggaagtggagagagtgcaattttgataaga  
 aaagagtcagaaaacgtaatttttaaaagtctaaatctttctacaaataagagcaaatttatttttttaatacaataaataat  
 ggaggacaaattcaattcacttggttgtaaaataaacttaaaccaataaccaaagaactaataaatcctgaagtgggaattattaag  
 gataatgtacatagacaatgaagaaataataggttcgatgaattaataataaaggatgttacaatcatcatgtgccaagtat  
 atacacaatattctatgggatttataatttcgttacttcacttaacttttgcgtaaataaaacgaattatctgatattttataataaaaca  
 gtttaattaagaaccatcatttttaacaacatagatatattttctaatagtttaatgatacttttaaatcttttaaatttatgtttcttttag  
 aaaaataaaattcaaaaaattaaatatatttcaaaaaactacaatcaaacacaactcatatattaaaagcaaaatatattttgaaaa  
 tttaagtgtcctaacaataagacaagaggaaaatgtacgatgagagacataaagagaactaataaattgaggagtcctataat  
 atataataaagtttattagtaaacttaattattaaggactcctaaaatatatgataggagaaaatgaatggtgagagatattggaa  
 aacttaataattaaggatttttaaaatatatggtaaaagataggcaaagtatccattatcccctttaactgaagtctactaggcgca  
 tgtgaaagttgattttttgtcacgtcatatagctataacgtaaaaaaagaaagtaaaatttttaatttttttaatatgacatattttaa  
 acgaaatataggacaaaatgtaaatgaatagtaaaaggaaacaaagattaatacttactttgtaagaatttaagataaatttaaat  
 ttaatagatcaactttacgtctagaagacccatatctagaaggaatttcacgaaatcggcccttattcaaaaaataacttttaataa  
 tgaatttttaatttaagaaataatatccaatgaataaatgacatgtagcattttacctaataatttcaactattttaatccaatattaatt  
 tgttttattccaacaatagaaagcttgtgacagacatttaattctgactttccagtactaaatattaattttctgaagattttcgggttta  
 gtccacaagtttttagtgagaagttttgctcaaaattttagggtgagaaggtttgatatttatctttgttaaattaatttatctagggtgact  
 attatttttaagtagaaattcatatcattacttttgccaactgtagtcataataggagtaggtgtatatgatgaaggaataaaca  
 gttcagtgaaagtattaaataaaatataatttaggtgtacatcaataaaaaaccttaagtttagaaaggcaccgaataattttgc  
 atagaagatattagtaaattataaaaaataaaagaaatgtagttgtcaagttgtcttcttttttgataaaaaatagcagttggcttat  
 gtcatcttttacaacctcatgccactgtccaattgttgacacttaactaattagtttgattcatgtatgaataactaaataatttttag  
 gactgactcaaataattttatattatcatagtaattttatctaatttttaggaccacttattactaaataataaattaactactactatatt  
 attgtgtgaaacaacaacgttttggtgttatgatgaaacgtacactatatcagtatgaaaaattcaaaacgattagataaattat  
 attgaaaatttgatatttttctattcttaacagacgtattgggttcatattttaaaaagggactaaacttagaagagaagttgtttg  
 aaactactttgtctcttctgttccatttctcttagatttcaaaaagtgaactactttatctcttctgttcacattttattttattctatt  
 ataaatatggcatcctcatattgagatttttagaaattattctaattcattcacagtgcaaaagaag
