# Supplementary material
Source: MDPI journal article supplement (https://www.mdpi.com/2077-0472/11/12/1195)
Supplement: s1 [file s1 › Supplementary file 3-4 Count of base in different regions.xlsx]

## Sheet: Supplementary file 3
Supplementary file 3 Number of A, T, C, and G bases in different regions of the 25 tissue-specific promoters
ID	~3000 bp				~2500 bp				~2000 bp				~1500 bp				~1000 bp				~500 bp
	A	T	C	G	A	T	C	G	A	T	C	G	A	T	C	G	A	T	C	G	A	T	C	G
Outer epidermis
pSolyc10g076200.1	1152	1021	427	400	931	862	373	334	737	680	312	271	557	512	230	201	390	316	145	149	185	164	89	62
pSolyc03g098700.1	879	914	630	577	773	783	489	455	664	652	354	330	533	520	232	215	383	364	127	126	206	173	51	70
pSolyc10g075100.1	1088	1057	458	397	937	869	389	305	724	717	306	253	571	519	225	185	376	342	162	120	186	155	104	55
pSolyc10g075090.1	1044	1153	434	369	865	950	388	297	731	755	303	211	546	553	253	148	370	374	164	92	175	190	92	43
pSolyc06g024380.1	557	722	842	879	467	597	705	731	386	481	564	569	295	355	429	421	196	247	280	277	98	129	141	132
Parenchyma
pSolyc07g049140.2	1132	1073	423	372	936	901	354	309	751	718	273	258	609	531	190	170	411	360	114	115	203	178	59	60
pSolyc04g007770.2	947	1122	491	440	787	935	393	385	596	752	305	347	461	547	229	263	296	382	156	166	164	176	78	82
pSolyc09g007940.2	1000	886	568	546	857	750	463	430	712	617	360	311	565	478	267	190	381	333	176	110	192	176	86	46
pSolyc01g096270.2	1007	944	440	609	847	774	363	516	666	645	278	411	470	512	219	299	279	365	163	193	143	188	67	102
pSolyc01g067730.2	1061	1216	359	364	900	1030	271	299	722	823	226	229	557	614	175	154	386	398	118	98	194	182	77	47
Vascular
pSolyc06g075220.1	964	1033	503	500	804	859	436	401	661	692	340	307	512	518	259	211	356	329	177	138	182	170	96	52
pSolyc04g026020.2	1070	1075	457	398	858	903	407	332	675	711	340	274	516	510	275	199	341	344	191	124	156	162	119	63
pSolyc05g006830.2	1078	1005	428	489	907	835	358	400	736	668	288	308	567	479	222	232	374	313	161	152	209	128	85	78
pSolyc01g111310.2	1130	1141	406	323	972	941	334	253	784	744	278	194	606	522	223	149	416	362	137	85	193	176	90	41
pSolyc09g010080.2	1092	1152	356	400	902	976	297	325	732	782	241	245	554	597	176	173	375	384	130	111	189	187	74	50
Collenchyma
pSolyc07g020860.2	1189	1100	366	345	989	912	314	285	792	741	257	210	595	534	212	159	382	359	156	103	195	190	74	41
pSolyc03g005000.2	839	921	701	539	696	776	580	448	557	635	456	352	430	482	333	255	302	335	205	158	173	174	78	75
pSolyc10g006790.2	1162	917	498	423	953	790	405	352	784	649	315	252	574	511	217	198	377	370	120	133	178	156	86	80
pSolyc09g013150.2	1137	1135	400	328	981	941	327	251	772	769	256	203	581	570	200	149	376	380	147	97	181	179	96	44
pSolyc01g105040.2	987	848	582	583	846	692	494	468	689	519	408	384	540	412	278	270	377	286	185	152	177	157	106	60
Inner epidermis
pSolyc09g062970.1	1100	1039	490	371	952	884	360	304	762	703	294	241	571	517	227	185	385	325	162	128	187	160	82	71
pSolyc09g062960.2	983	1015	438	564	823	850	382	445	675	681	350	294	517	498	282	203	337	343	185	135	190	149	92	69
pSolyc04g082170.2	878	1021	485	616	749	839	405	507	619	668	315	398	487	515	223	275	346	344	144	166	180	175	61	84
pSolyc04g072310.2	1124	1102	381	393	926	912	319	343	734	721	264	281	573	546	189	192	388	361	130	121	198	165	75	62
pSolyc06g065530.2	1218	1081	341	360	1017	889	280	314	807	706	221	266	627	526	154	193	415	355	110	120	190	197	66	47
The 'A ' of the translation initiation codon (ATG) was designated into +1, while the first upstream nucleotide of the 'A' was designated into -1

## Sheet: Supplementary file 4
Supplementary file 4 Percentage (%) of A/T and C/G in different regions of the 25 tissue-specific promoters
ID	~3000 bp		~2500 bp		~2000 bp		~1500 bp		~1000 bp		~500 bp
	A/T	C/G	A/T	C/G	A/T	C/G	A/T	C/G	A/T	C/G	A/T	C/G
Outer epidermis
pSolyc10g076200.1	72.4333	27.5667	71.72	28.28	70.85	29.15	71.2667	28.7333	70.6	29.4	69.8	30.2
pSolyc03g098700.1	59.7667	40.2333	62.24	37.76	65.8	34.2	70.2	29.8	74.7	25.3	75.8	24.2
pSolyc10g075100.1	71.5	28.5	72.24	27.76	72.05	27.95	72.6667	27.3333	71.8	28.2	68.2	31.8
pSolyc10g075090.1	73.2333	26.7667	72.6	27.4	74.3	25.7	73.2667	26.7333	74.4	25.6	73	27
pSolyc06g024380.1	42.6333	57.3667	42.56	57.44	43.35	56.65	43.3333	56.6667	44.3	55.7	45.4	54.6
Parenchyma
pSolyc07g049140.2	73.5	26.5	73.48	26.52	73.45	26.55	76	24	77.1	22.9	76.2	23.8
pSolyc04g007770.2	68.9667	31.0333	68.88	31.12	67.4	32.6	67.2	32.8	67.8	32.2	68	32
pSolyc09g007940.2	62.8667	37.1333	64.28	35.72	66.45	33.55	69.5333	30.4667	71.4	28.6	73.6	26.4
pSolyc01g096270.2	65.0333	34.9667	64.84	35.16	65.55	34.45	65.4667	34.5333	64.4	35.6	66.2	33.8
pSolyc01g067730.2	75.9	24.1	77.2	22.8	77.25	22.75	78.0667	21.9333	78.4	21.6	75.2	24.8
Vascular
pSolyc06g075220.1	66.5667	33.4333	66.52	33.48	67.65	32.35	68.6667	31.3333	68.5	31.5	70.4	29.6
pSolyc04g026020.2	71.5	28.5	70.44	29.56	69.3	30.7	68.4	31.6	68.5	31.5	63.6	36.4
pSolyc05g006830.2	69.4333	30.5667	69.68	30.32	70.2	29.8	69.7333	30.2667	68.7	31.3	67.4	32.6
pSolyc01g111310.2	75.7	24.3	76.52	23.48	76.4	23.6	75.2	24.8	77.8	22.2	73.8	26.2
pSolyc09g010080.2	74.8	25.2	75.12	24.88	75.7	24.3	76.7333	23.2667	75.9	24.1	75.2	24.8
Collenchyma
pSolyc07g020860.2	76.3	23.7	76.04	23.96	76.65	23.35	75.2667	24.7333	74.1	25.9	77	23
pSolyc03g005000.2	58.6667	41.3333	58.88	41.12	59.6	40.4	60.8	39.2	63.7	36.3	69.4	30.6
pSolyc10g006790.2	69.3	30.7	69.72	30.28	71.65	28.35	72.3333	27.6667	74.7	25.3	66.8	33.2
pSolyc09g013150.2	75.7333	24.2667	76.88	23.12	77.05	22.95	76.7333	23.2667	75.6	24.4	72	28
pSolyc01g105040.2	61.1667	38.8333	61.52	38.48	60.4	39.6	63.4667	36.5333	66.3	33.7	66.8	33.2
Inner epidermis
pSolyc09g062970.1	71.3	28.7	73.44	26.56	73.25	26.75	72.5333	27.4667	71	29	69.4	30.6
pSolyc09g062960.2	66.6	33.4	66.92	33.08	67.8	32.2	67.6667	32.3333	68	32	67.8	32.2
pSolyc04g082170.2	63.3	36.7	63.52	36.48	64.35	35.65	66.8	33.2	69	31	71	29
pSolyc04g072310.2	74.2	25.8	73.52	26.48	72.75	27.25	74.6	25.4	74.9	25.1	72.6	27.4
pSolyc06g065530.2	76.6333	23.3667	76.24	23.76	75.65	24.35	76.8667	23.1333	77	23	77.4	22.6
mean	68.6813	31.3187	69	31	69.394	30.606	70.112	29.888	70.744	29.256	70.08	29.92
SD(Standard deviation)	7.7	7.7	7.64	7.64	7.39	7.39	7.17	7.17	6.94	6.94	6.39	6.39
The 'A ' of the translation initiation codon (ATG) was designated into +1, while the first upstream nucleotide of the 'A' was designated into -1
