# Supplementary material
Source: MDPI journal article supplement (https://www.mdpi.com/2077-0472/11/12/1195)
Supplement: s1 [file s1 › Supplementary file 6 Genetic distances.xlsx]

## Sheet: Supplementary file 6
Supplementary file 6 Genetic distance between each pair of promoter sequences*
-3000~-1	mean=0.668
	001	002	003	004	005	006	007	008	009	010	011	012	013	014	015	016	017	018	019	020	021	022	023	024
002	0.688749
003	0.624481	0.689474
004	0.655629	0.685959	0.658161
005	0.736003	0.717975	0.737943	0.742002
006	0.664441	0.692916	0.65167	0.659822	0.74433
007	0.681404	0.704608	0.669131	0.643175	0.742414	0.682409
008	0.668555	0.696583	0.677339	0.67643	0.733333	0.693648	0.706207
009	0.700502	0.710352	0.688354	0.707462	0.744533	0.6926	0.696061	0.694146
010	0.601197	0.650124	0.606135	0.623409	0.687903	0.639076	0.64476	0.648561	0.653202
011	0.686185	0.661571	0.675799	0.670017	0.730756	0.678225	0.686187	0.702448	0.709723	0.635361
012	0.679225	0.69721	0.660557	0.668615	0.748534	0.667348	0.657369	0.684842	0.697137	0.629484	0.675148
013	0.666903	0.702656	0.659333	0.663793	0.739924	0.654359	0.687802	0.695385	0.703909	0.628325	0.666783	0.677155
014	0.63684	0.663627	0.623599	0.632746	0.739561	0.634887	0.651163	0.679674	0.678892	0.582531	0.659605	0.650124	0.663581
015	0.66443	0.679337	0.651064	0.655743	0.736879	0.649292	0.669544	0.693638	0.69659	0.620727	0.682103	0.636145	0.658076	0.654571
016	0.621275	0.669565	0.63187	0.641594	0.731364	0.64568	0.658188	0.677113	0.680471	0.585332	0.651795	0.652465	0.656349	0.603853	0.626587
017	0.725778	0.701503	0.707291	0.702194	0.738723	0.71816	0.71488	0.700103	0.723177	0.670533	0.712684	0.704749	0.703462	0.682323	0.684851	0.679971
018	0.615466	0.660963	0.636909	0.644262	0.721341	0.652283	0.66906	0.662324	0.684579	0.555284	0.674242	0.661139	0.65506	0.614731	0.658484	0.620471	0.690703
019	0.605478	0.665466	0.616312	0.625902	0.727107	0.63198	0.645954	0.649963	0.677083	0.493403	0.64016	0.636496	0.645933	0.598294	0.640659	0.601911	0.68787	0.570531
020	0.682618	0.700931	0.674665	0.700861	0.735889	0.664588	0.703525	0.704686	0.719972	0.65747	0.695743	0.702076	0.698139	0.691135	0.692255	0.677317	0.744799	0.679668	0.672986
021	0.668543	0.711578	0.642006	0.648723	0.745822	0.650277	0.670242	0.683374	0.689789	0.63171	0.673997	0.661011	0.678324	0.632646	0.666436	0.641728	0.708174	0.658318	0.636429	0.694368
022	0.690527	0.701596	0.671647	0.683592	0.749306	0.677408	0.708032	0.685389	0.69855	0.645788	0.700384	0.679685	0.676129	0.6601	0.661163	0.671262	0.710562	0.683309	0.64708	0.718349	0.682749
023	0.70939	0.702646	0.680214	0.702909	0.751564	0.684083	0.716212	0.719147	0.723478	0.649675	0.687696	0.692149	0.673077	0.674544	0.689073	0.680482	0.7165	0.69012	0.662491	0.719062	0.678054	0.704828
024	0.661662	0.683316	0.652265	0.640901	0.739054	0.643992	0.643575	0.693728	0.683175	0.602048	0.665394	0.664822	0.666317	0.62251	0.63761	0.631014	0.704275	0.643543	0.636526	0.684912	0.650666	0.684979	0.685684
025	0.618099	0.672114	0.618283	0.633748	0.725963	0.614751	0.644231	0.667028	0.665451	0.56706	0.650071	0.647376	0.659305	0.611425	0.633585	0.603846	0.678922	0.599022	0.568118	0.687165	0.656071	0.66885	0.671869	0.609065
-2500~-1	mean=0.666
	001	002	003	004	005	006	007	008	009	010	011	012	013	014	015	016	017	018	019	020	021	022	023	024
002	0.680266
003	0.663417	0.681323
004	0.662386	0.680842	0.653652
005	0.748849	0.726471	0.744828	0.738298
006	0.658988	0.674979	0.62833	0.659574	0.752612
007	0.674938	0.698486	0.653992	0.646863	0.72989	0.661954
008	0.694157	0.700417	0.667661	0.682886	0.741788	0.684578	0.685417
009	0.707884	0.712951	0.682051	0.677312	0.748837	0.694816	0.703857	0.705635
010	0.637382	0.638189	0.580795	0.612917	0.704961	0.616975	0.629598	0.654326	0.661631
011	0.685147	0.678571	0.668224	0.672471	0.741908	0.662796	0.677178	0.700499	0.705468	0.638663
012	0.692308	0.693528	0.661683	0.653001	0.740341	0.675207	0.675879	0.682024	0.688312	0.640815	0.677727
013	0.694283	0.706224	0.646934	0.653104	0.750621	0.65771	0.676347	0.682736	0.683193	0.631852	0.690486	0.690095
014	0.642587	0.676936	0.614865	0.635169	0.729787	0.633951	0.655987	0.67173	0.667092	0.591561	0.665685	0.644781	0.651718
015	0.670933	0.658385	0.644247	0.665134	0.739348	0.659119	0.674948	0.682553	0.684144	0.614267	0.682216	0.649399	0.66639	0.630507
016	0.654981	0.654507	0.605998	0.629945	0.72299	0.645753	0.645807	0.670236	0.669247	0.567114	0.66823	0.659811	0.654468	0.593815	0.643401
017	0.708333	0.697518	0.687633	0.688953	0.727503	0.707347	0.710091	0.716008	0.715413	0.654905	0.69967	0.718685	0.728107	0.686027	0.691732	0.679949
018	0.665371	0.659584	0.610034	0.649679	0.741274	0.659081	0.666952	0.670259	0.670425	0.558159	0.654405	0.65578	0.681389	0.624791	0.658018	0.622767	0.678986
019	0.644868	0.650685	0.589474	0.630249	0.730618	0.626569	0.640207	0.649587	0.665072	0.480897	0.653431	0.636995	0.647772	0.598226	0.629725	0.574361	0.683572	0.568399
020	0.696324	0.684954	0.678209	0.68615	0.74403	0.667356	0.711644	0.708351	0.695449	0.642276	0.690436	0.723422	0.695526	0.664432	0.6875	0.673322	0.723877	0.672657	0.658737
021	0.650502	0.682716	0.650607	0.647084	0.756529	0.652772	0.666107	0.668894	0.668922	0.603573	0.66917	0.654652	0.651559	0.621061	0.649834	0.629134	0.698153	0.651971	0.616667	0.670539
022	0.701856	0.71542	0.686834	0.682387	0.736951	0.674208	0.695544	0.708762	0.689871	0.638492	0.710308	0.675319	0.682474	0.666526	0.669562	0.662505	0.716965	0.676038	0.648495	0.723289	0.693053
023	0.70412	0.706672	0.682709	0.692015	0.742042	0.674773	0.710758	0.713402	0.71633	0.645091	0.709341	0.683128	0.663501	0.694585	0.680913	0.666523	0.7194	0.702597	0.668559	0.710483	0.673109	0.714579
024	0.670706	0.668637	0.629303	0.658789	0.748613	0.654167	0.670284	0.673521	0.691207	0.597789	0.676898	0.660219	0.651681	0.597463	0.659378	0.629928	0.702601	0.638055	0.61791	0.677324	0.628667	0.678407	0.684056
025	0.657376	0.663986	0.611181	0.62845	0.737321	0.632208	0.628401	0.66681	0.671098	0.560955	0.659666	0.66681	0.654077	0.612795	0.647433	0.613051	0.683827	0.603853	0.562369	0.670353	0.624895	0.669543	0.674148	0.61921
-2000~-1	mean=0.666
	001	002	003	004	005	006	007	008	009	010	011	012	013	014	015	016	017	018	019	020	021	022	023	024
002	0.687027
003	0.663371	0.673948
004	0.628796	0.674814	0.636364
005	0.75324	0.725269	0.734984	0.732564
006	0.680807	0.653846	0.63925	0.644909	0.727085
007	0.68681	0.698103	0.671875	0.672378	0.725992	0.669984
008	0.689834	0.6944	0.676394	0.682057	0.755325	0.675507	0.689798
009	0.706716	0.698498	0.695005	0.671792	0.739221	0.682531	0.694112	0.711838
010	0.632719	0.632227	0.605348	0.605687	0.695604	0.586968	0.637351	0.646388	0.644199
011	0.678947	0.675619	0.670853	0.674187	0.734031	0.681342	0.694959	0.711479	0.709494	0.628821
012	0.67369	0.688039	0.655875	0.66024	0.716701	0.680349	0.689854	0.676547	0.691023	0.620239	0.666492
013	0.697576	0.697674	0.659162	0.654327	0.742812	0.658639	0.682752	0.673575	0.695764	0.631751	0.685641	0.654706
014	0.656233	0.657909	0.652034	0.622139	0.722403	0.627273	0.661859	0.666845	0.662162	0.57619	0.661874	0.654933	0.64017
015	0.660705	0.658588	0.637968	0.643125	0.723555	0.631438	0.6548	0.684382	0.686918	0.56086	0.667745	0.662366	0.64949	0.615026
016	0.635281	0.639578	0.639485	0.604278	0.739629	0.607507	0.637885	0.662527	0.639803	0.483854	0.638183	0.635135	0.629093	0.564945	0.605744
017	0.700155	0.704098	0.690339	0.698795	0.748715	0.681115	0.728075	0.71355	0.722854	0.673782	0.694704	0.70561	0.717549	0.69973	0.695983	0.67714
018	0.656267	0.634718	0.619073	0.639203	0.726171	0.62439	0.671909	0.658843	0.667035	0.553158	0.664305	0.64981	0.649161	0.607648	0.622908	0.548067	0.710916
019	0.649647	0.647805	0.643858	0.631719	0.733152	0.637977	0.657542	0.671166	0.665025	0.581444	0.660194	0.641234	0.662567	0.610125	0.60973	0.566719	0.680805	0.604079
020	0.705791	0.700753	0.699634	0.681603	0.731405	0.680328	0.705357	0.726941	0.696335	0.662677	0.696156	0.704733	0.722105	0.66829	0.69799	0.668298	0.723869	0.654605	0.682116
021	0.661248	0.668269	0.659443	0.646114	0.738648	0.640706	0.682748	0.679038	0.676752	0.592238	0.673309	0.661795	0.664574	0.622951	0.620139	0.604899	0.67979	0.635439	0.619861	0.684874
022	0.686151	0.676471	0.67874	0.667016	0.737421	0.665607	0.692427	0.716216	0.688144	0.655629	0.696907	0.664564	0.686567	0.663793	0.68286	0.652861	0.6889	0.668132	0.659598	0.714589	0.686409
023	0.704167	0.696677	0.694987	0.67106	0.741619	0.690786	0.694459	0.693773	0.708227	0.664274	0.703302	0.69617	0.672334	0.692599	0.688901	0.653783	0.729882	0.679494	0.688489	0.722571	0.689619	0.69969
024	0.675263	0.68929	0.652828	0.659607	0.744038	0.616025	0.677842	0.682154	0.679446	0.61854	0.683544	0.668063	0.679937	0.646497	0.635307	0.607238	0.696825	0.636702	0.640849	0.694605	0.640706	0.681144	0.675546
025	0.650846	0.660317	0.648417	0.637774	0.723439	0.633727	0.673305	0.666124	0.650438	0.564157	0.657881	0.648108	0.658471	0.611777	0.608468	0.571429	0.683033	0.603872	0.594877	0.693399	0.625267	0.676072	0.67631	0.652429
-1500~-1	mean=0.660
	001	002	003	004	005	006	007	008	009	010	011	012	013	014	015	016	017	018	019	020	021	022	023	024
002	0.66879
003	0.657932	0.669215
004	0.622734	0.6611	0.659471
005	0.73913	0.729064	0.759272	0.725337
006	0.62081	0.647226	0.627591	0.609309	0.735573
007	0.677722	0.673023	0.675713	0.677762	0.743394	0.66302
008	0.653627	0.663187	0.639004	0.64863	0.73556	0.640636	0.702703
009	0.690493	0.683182	0.683252	0.66338	0.759722	0.64859	0.702322	0.69958
010	0.590909	0.615385	0.590093	0.604965	0.721528	0.499655	0.63563	0.627806	0.638869
011	0.680986	0.673384	0.655172	0.657658	0.757447	0.63741	0.697609	0.701181	0.687456	0.62563
012	0.672792	0.677978	0.655221	0.652566	0.737027	0.652827	0.662913	0.655076	0.690693	0.618364	0.667825
013	0.674352	0.662247	0.653926	0.662438	0.761773	0.637818	0.661633	0.674691	0.695591	0.613353	0.676224	0.690111
014	0.634439	0.661111	0.634932	0.637741	0.741935	0.614347	0.674126	0.661592	0.660364	0.59444	0.651515	0.662983	0.6625
015	0.63205	0.670183	0.630802	0.630223	0.733142	0.61351	0.668817	0.647897	0.657709	0.593422	0.654304	0.652357	0.654312	0.632168
016	0.602911	0.645046	0.647309	0.62334	0.727862	0.61855	0.649603	0.646176	0.652174	0.57695	0.649185	0.65483	0.665947	0.629292	0.626207
017	0.701439	0.691155	0.692902	0.695131	0.733945	0.676385	0.706454	0.710526	0.697293	0.643846	0.698179	0.691218	0.695983	0.686932	0.696057	0.688442
018	0.640138	0.656073	0.640592	0.633079	0.722787	0.606103	0.6578	0.659971	0.66259	0.59399	0.68358	0.654636	0.66092	0.598878	0.643986	0.611227	0.689855
019	0.652817	0.630886	0.647829	0.643005	0.747869	0.609964	0.664553	0.662701	0.660815	0.592275	0.678571	0.64579	0.658485	0.612637	0.639413	0.631061	0.682138	0.617275
020	0.697691	0.687544	0.673611	0.689825	0.754691	0.66932	0.67284	0.71091	0.715901	0.657414	0.692577	0.67507	0.684642	0.68122	0.691376	0.654925	0.712215	0.675966	0.6683
021	0.654979	0.672188	0.649789	0.650174	0.755855	0.622951	0.674419	0.685714	0.669456	0.618402	0.671528	0.678645	0.678571	0.597909	0.638089	0.639858	0.692745	0.64573	0.629268	0.704096
022	0.6875	0.654979	0.652846	0.665014	0.757785	0.649635	0.681914	0.675226	0.699306	0.645421	0.691445	0.673823	0.682893	0.669937	0.674037	0.659436	0.687278	0.660391	0.662906	0.693878	0.672028
023	0.668119	0.684583	0.681435	0.663121	0.74386	0.659341	0.683631	0.691085	0.70339	0.641648	0.690409	0.676491	0.676309	0.681404	0.683104	0.648296	0.702536	0.675164	0.681241	0.698061	0.683168	0.707779
024	0.651622	0.661187	0.631047	0.63005	0.726869	0.572514	0.653875	0.671784	0.655223	0.540278	0.662114	0.648375	0.65	0.638511	0.607843	0.615764	0.674982	0.621339	0.619829	0.688321	0.648571	0.666176	0.665182
025	0.632823	0.638194	0.640614	0.618357	0.728315	0.566366	0.644492	0.654417	0.62438	0.549374	0.663643	0.651261	0.65812	0.624394	0.591191	0.599024	0.685225	0.587379	0.609148	0.652482	0.631176	0.65505	0.657061	0.625612
-1000~-1	mean=0.659
	001	002	003	004	005	006	007	008	009	010	011	012	013	014	015	016	017	018	019	020	021	022	023	024
002	0.636158
003	0.662091	0.65867
004	0.673224	0.606506	0.64263
005	0.747899	0.721461	0.719912	0.723757
006	0.674468	0.606061	0.650465	0.620469	0.737307
007	0.680423	0.630243	0.662176	0.673448	0.72885	0.657922
008	0.638743	0.633479	0.650424	0.640426	0.734523	0.660256	0.681481
009	0.685832	0.632768	0.680423	0.670678	0.733051	0.680042	0.6902	0.706933
010	0.620044	0.565762	0.609257	0.634636	0.720982	0.621679	0.655809	0.624464	0.659669
011	0.664234	0.665924	0.652314	0.664147	0.714876	0.614301	0.697849	0.654244	0.700738	0.620502
012	0.67759	0.655481	0.662875	0.637744	0.725191	0.653361	0.646875	0.691898	0.723337	0.62322	0.689581
013	0.683106	0.648796	0.650777	0.674814	0.737811	0.620619	0.66632	0.667373	0.682057	0.65194	0.689434	0.708159
014	0.67316	0.622363	0.627225	0.623337	0.718033	0.607368	0.653602	0.623815	0.663774	0.594963	0.66631	0.647752	0.643836
015	0.662753	0.603037	0.636743	0.602972	0.767896	0.619497	0.663158	0.641728	0.663113	0.613808	0.648128	0.657233	0.657895	0.608237
016	0.675381	0.572193	0.639871	0.596436	0.724781	0.606417	0.649085	0.660277	0.686275	0.565998	0.611828	0.643629	0.654506	0.605839	0.606383
017	0.711319	0.683502	0.695607	0.682213	0.747346	0.696109	0.728025	0.691023	0.683128	0.676568	0.692308	0.71384	0.693194	0.689247	0.666667	0.665227
018	0.622914	0.53822	0.627174	0.605069	0.716049	0.595264	0.632787	0.636069	0.659978	0.503112	0.622125	0.640089	0.646355	0.598101	0.624864	0.584034	0.678097
019	0.65272	0.630077	0.642708	0.653968	0.75	0.605181	0.654167	0.638165	0.691268	0.621767	0.656383	0.64749	0.657732	0.651531	0.626178	0.609208	0.690476	0.633588
020	0.669095	0.665922	0.666667	0.661255	0.751073	0.661409	0.678756	0.657203	0.7	0.647702	0.689619	0.691909	0.687371	0.659871	0.668776	0.673866	0.673868	0.66113	0.663223
021	0.67019	0.628261	0.654952	0.648734	0.736954	0.649085	0.651892	0.661491	0.688559	0.63695	0.682008	0.702703	0.669133	0.58534	0.635394	0.630851	0.723698	0.649675	0.639535	0.675504
022	0.709908	0.673143	0.659936	0.637168	0.740355	0.680556	0.689947	0.672322	0.716923	0.6396	0.713987	0.666667	0.674051	0.663388	0.651288	0.665208	0.704357	0.667416	0.688421	0.705821	0.678762
023	0.669405	0.675978	0.657534	0.683351	0.739451	0.656748	0.687631	0.66459	0.712667	0.639254	0.650943	0.690126	0.68652	0.663802	0.671233	0.654388	0.683453	0.66113	0.672917	0.696594	0.656873	0.71517
024	0.669772	0.672646	0.648822	0.627856	0.746875	0.672026	0.673362	0.665625	0.693194	0.652412	0.644928	0.681283	0.678002	0.636853	0.637234	0.640086	0.687565	0.671096	0.654661	0.665964	0.648936	0.653167	0.642336
025	0.642232	0.592202	0.632025	0.619895	0.724558	0.620213	0.676375	0.620579	0.654525	0.573958	0.661957	0.648268	0.66309	0.619689	0.607717	0.587487	0.688596	0.583596	0.612903	0.644565	0.653234	0.670354	0.650327	0.637761
-500~-1	mean=0.664
	001	002	003	004	005	006	007	008	009	010	011	012	013	014	015	016	017	018	019	020	021	022	023	024
002	0.671024
003	0.663812	0.655983
004	0.673684	0.651357	0.661702
005	0.701646	0.713656	0.72043	0.715499
006	0.697572	0.620253	0.609544	0.64135	0.75
007	0.675732	0.658065	0.650862	0.66875	0.751579	0.664474
008	0.662393	0.604211	0.627859	0.640919	0.736617	0.614894	0.639485
009	0.709016	0.642702	0.667382	0.695378	0.71875	0.690789	0.690832	0.670913
010	0.658371	0.597826	0.595506	0.656587	0.696629	0.482255	0.678652	0.626087	0.628378
011	0.66457	0.67234	0.644068	0.655031	0.725367	0.634043	0.700624	0.699374	0.689076	0.641138
012	0.731161	0.683516	0.655172	0.677966	0.734151	0.716814	0.643606	0.698718	0.679671	0.68552	0.725572
013	0.645963	0.631236	0.667377	0.695198	0.748971	0.67033	0.66736	0.691649	0.684211	0.641892	0.66875	0.686722
014	0.663043	0.61039	0.618844	0.605544	0.692982	0.601751	0.668122	0.581053	0.663043	0.554566	0.62069	0.64693	0.65
015	0.647059	0.671674	0.636555	0.604603	0.733193	0.603896	0.666667	0.629167	0.692469	0.630197	0.647917	0.663158	0.667368	0.62395
016	0.687912	0.574153	0.621277	0.59322	0.748899	0.562633	0.639738	0.590437	0.676856	0.588745	0.613248	0.685022	0.646154	0.478903	0.617021
017	0.699588	0.684211	0.660944	0.714588	0.747951	0.671082	0.694845	0.69936	0.697917	0.649321	0.66805	0.708163	0.689441	0.660832	0.67437	0.620614
018	0.676533	0.646316	0.629787	0.705761	0.717021	0.650215	0.6841	0.657505	0.66879	0.638767	0.658996	0.690832	0.692632	0.642398	0.668067	0.638298	0.712766
019	0.67437	0.613445	0.629938	0.661826	0.736287	0.623404	0.657447	0.610656	0.644351	0.616228	0.644033	0.664557	0.710084	0.633262	0.644033	0.658898	0.686975	0.685535
020	0.668874	0.618534	0.686534	0.673774	0.720264	0.654008	0.687234	0.62635	0.696703	0.671674	0.670213	0.695842	0.673961	0.649438	0.661572	0.626638	0.675269	0.649237	0.680346
021	0.718427	0.657328	0.702128	0.663883	0.735417	0.647702	0.668041	0.668776	0.704403	0.642857	0.687243	0.666667	0.689441	0.655914	0.650628	0.636957	0.719008	0.655462	0.696017	0.676026
022	0.687885	0.634146	0.67462	0.672377	0.73125	0.681514	0.643162	0.657328	0.714876	0.645309	0.702128	0.709278	0.675105	0.671082	0.676533	0.641593	0.688935	0.684549	0.67019	0.710762	0.711864
023	0.681633	0.671024	0.671642	0.642706	0.721992	0.654945	0.670213	0.666667	0.689162	0.647856	0.677149	0.690574	0.689076	0.637744	0.632568	0.64488	0.672878	0.676533	0.683333	0.690265	0.644958	0.703476
024	0.676289	0.632385	0.648822	0.618844	0.767296	0.625	0.655246	0.623404	0.671488	0.607798	0.674468	0.672199	0.655319	0.615721	0.669474	0.620087	0.624738	0.648188	0.692632	0.690583	0.70339	0.655804	0.674847
025	0.698113	0.666667	0.631356	0.610204	0.707113	0.574153	0.672234	0.627329	0.678571	0.600868	0.644309	0.682008	0.680585	0.63113	0.582121	0.603814	0.691023	0.632017	0.671488	0.678723	0.668737	0.691489	0.607143	0.653191
* Each value indicts the genetic distance between a couple of promoter sequences
001, pSolyc10g076200.1; 002, pSolyc03g098700.1; 003,pSolyc10g075100.1; 004, pSolyc10g075090.1; 005, pSolyc06g024380.1 dervied from Outer epidermis(oep).
006, pSolyc07g049140.2; 007, pSolyc04g007770.2; 008, pSolyc09g007940.2; 009, pSolyc01g096270.2; 010, pSolyc01g067730.2 derived from Parenchyma(par).
011, pSolyc06g075220.1; 012, pSolyc04g026020.2; 013,pSolyc05g006830.2; 014, pSolyc01g111310.2; 015, pSolyc09g010080.2 derived from Vascular(vas).
016, pSolyc07g020860.2; 017, pSolyc03g005000.2; 018, pSolyc10g006790.2; 019,pSolyc09g013150.2; 020,pSolyc01g105040.2 devied from Collenchyma(col).
021,pSolyc09g062970.1; 022, pSolyc09g062960.2; 023, pSolyc04g082170.2; 024, pSolyc04g072310.2; 025, pSolyc06g065530.2 derived from Inner epidermis(iep).
