# Supplementary material
Source: MDPI journal article supplement (https://www.mdpi.com/2077-0472/11/12/1195)
Supplement: s1 [file s1 › Supplementary file 7-8 Distribution of cis elements.xlsx]

## Sheet: Supplementary file 7
Supplementary file 7 Distribution of cis-regulatory elements in the tissue-specific promoters
	Elements of the core promoter						phytohormone responsive elements								Tissue-spectific element
Promoter ID	CCAAT box	CAAT box	CAT box	DPE	GC box	TATA box	ABARE	ARE1	ARE2	ARF-bs	ASR	ERE	GARE	GASRE	AC-I	AC-II	AnSE1	AnSE2	Box P	BS1	(CA)n	FSE	SITEIIATCYTC
Anther-specific
pSolyc04g082170.2	-382,-618,-801,-866	-814		-108,-131,-137			-1284		-558	-389,-1725	-697		-321	-1396		-1631
pSolyc09g007940.2	-815,-1601,-2466	-301,-437,-696		-52,-189		-344	-1943	-2193	-245	-1427,-1631			-173	-1769	-1985	-820							-2263
pSolyc09g010080.2	-66,-806,-2277,-2582	-65,-805			-2963	-76			-612,-673,-1124,-1906	-2266,-2454	-474		-1210	-104,-1864			-1348				-838		-2282
pSolyc10g076200.1	-168,-265,-1158,-2780,-2875	-167,-210,-264,-279,-407,-1124	-117,-918						-495,-1097		-1302								-927		-471,-1332		-174,-896
Fruit-specific
pSolyc03g098700.1	-1523,-1964,-2409	-210	-2005,-2029	-19,-38,-114		-46		-1665,-2622,-2924	-1000	-2762	-330,-703,-2247,-2823	-605		-796,-954,-1800					-1232,-1278		-2028	-647,-972,-1502	-2506
pSolyc04g007770.2	-2377	-474,-542		-260,-271,-278,-287			-198		-1545,-2941	-2775	-127,-166			-648,-1205,-1705							-2356,-2507,-2750
pSolyc07g049140.2	-1420,-2190,-2905	-587,-610 ,-658		+20		-88	-2201	-1734	-509,-1160,-2325	-215	-2214,-2821	-982,-2649										-2256
pSolyc10g075090.1	-615,-1806,-2097	-198		-187,-202,-241		-92	-1341	-205	-164,-378,-701,-2326	-529	-1643,-2502										-66,-323,-1135		-226
Leaf-specific
pSolyc09g062960.2	-403,-1324,-1374	-402,-601,-684,-1100		-9,-27,-221,-271	-2937		-55,-445	-1565	-14,-2709	-1126	-2124,-2228	-436		-1344,-1828				-319
pSolyc09g062970.1	-409,-2233,-2502	-408,-527,-632,-679	-2884	-52,-62,-218,-228			-746	-1289	-1129,-1429,-2617		-2066		-2108	-819,-1735,-2505		-173					-2425		-2854
pSolyc10g075100.1	-582,-1993	-337,-447,-576,-581,-848		-229,-295,-314			-1790	-1999	-204,-882,-1102,-1203,-2222,-2928	-2147	-1290			-585								-1816
Root/stem-specific
pSolyc04g026020.2	-387,-1675,-1850,-2904	-357,-386,-600		-111		-94	-685,-1670		-158,-2175,-2586			-615,-1811		-390						-1383	-754	-566,-2511
pSolyc06g075220.1	-535,-659,-811	-335,-367,-491		-22,-118		-210		-793	-479,-619,-1015,-2161							-95						-2544
Sepal-specific
pSolyc01g105040.2	-405,-1053,-1651,-1830	-404,-466,-488,-1829		-194,-223,-296,-301,-381				-1003					-2900								-11,-327	-2220	-2211
pSolyc06g065530.2	-1525,-2693	-86,-502,-705,-900,-1110		-56		-66	-1732	-1662	-1257		-1439,-1464,-2260		-1325	-2317
Elements of core promoter
CAAT box (CAAT), transcriptional activation (Shirsat et al., 1989); CCAAT box (CCAAT), transcriptional activation; CAT box (GCCAAC), cis-acting regulatory element related to meristem expression (Porto et al., 2014); DPE, downstream promoter element( A/G+28-G-A/T-C/T-G/A/C), located at approximately 30 nucleotides downstream of the TSS of many TATA-less promoters (Burke and Kadonaga, 1996); GC box…
Phytohormone responsive elements
ABARE, ABA-responsive element (CATGCA)( Munir et al., 2016) ; ARE1/ARE2, Auxin responsive element (CGTGG/ACTTTA) (Munir et al., 2016); ARFbs, Auxin response factor binding site (TGt/cCTC), primary/early auxin response (Ulmasov et al., 1999); ASR, Auxin and salicylic acid responsive site(TGACG)( Munir et al., 2016); ERE, Ethylene-responsive element (ATTTCAAA), senescence and ethylene-responsive (I…
Tissue-specific elements
AnSE1/AnSE2, anther specific element (GAAT and ATTGTGA/TGTGGTT)(van Tunen et al., 1990; Twell et al., 1991); AC-I/AC-II (ACCTACC/ACCAACC), responsible/ enhanced xylem and/or repressed phloem expression for vascular (Patzlaff et al., 2003) ; Box P (c/aACCAAAC), phenylpropanoid/lignin biosynthesis (Da Costa e Silva et al., 1993; Feuillet et al., 1995; Ito et al., 2000); BS1 (AGCGGG), vascular tissu…

## Sheet: Supplementary file 8
Supplementary file 8 Number of cis-regulatory elements in the tissue-specific promoters
Promoter ID	Core elements	Phytohormone responsive elements	Tissue-spectific elements	SUM
Anther-specific
pSolyc04g082170.2	8	7	1	16
pSolyc09g007940.2	9	7	3	19
pSolyc09g010080.2	8	10	3	21
pSolyc10g076200.1	13	3	5	21
Fruit-specific
pSolyc03g098700.1	10	13	7	30
pSolyc04g007770.2	7	9	3	19
pSolyc07g049140.2	8	10	1	19
pSolyc10g075090.1	8	9	4	21
Leaf-specific
pSolyc09g062960.2	12	11	1	24
pSolyc09g062970.1	12	10	3	25
pSolyc10g075100.1	10	11	1	22
Root/stem-specific
pSolyc04g026020.2	9	8	4	21
pSolyc06g075220.1	9	5	2	16
Sepal-specific
pSolyc01g105040.2	13	2	4	19
pSolyc06g065530.2	9	8	0	17
