# Supplementary material
Source: MDPI journal article supplement (https://www.mdpi.com/2077-0472/11/12/1195)

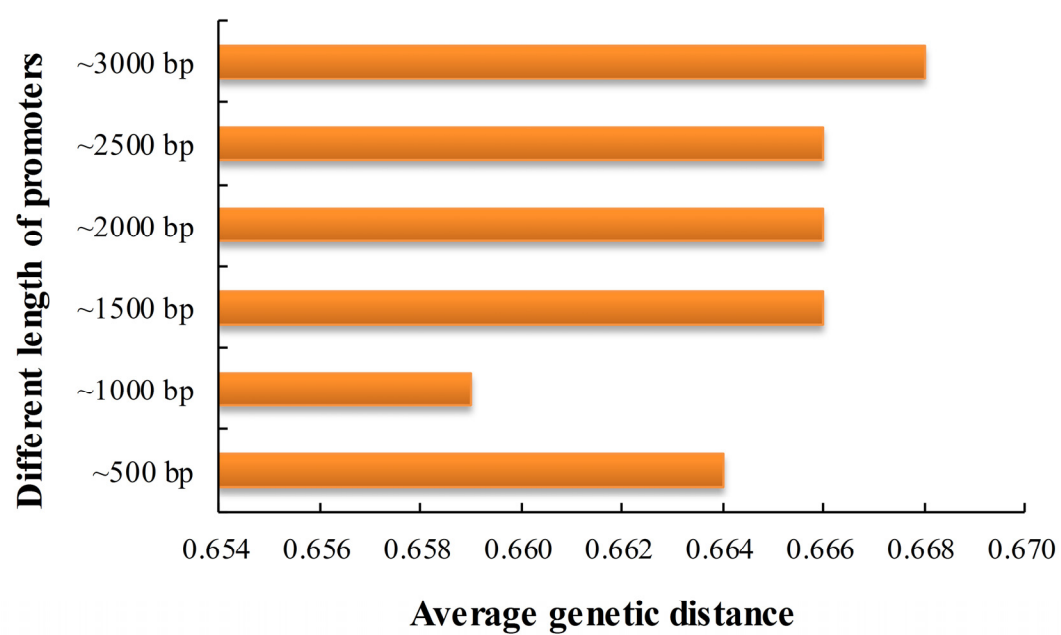

**Supplementary file S5** Average genetic distance between different lengths of the 25 promoters

Supplement: s1 [file s1 › Supplementary file 5 Average genetic distance.pdf]
